# Supplementary material for: Protective Mechanisms of Nootropic Herb Shankhpushpi (Convolvulus pluricaulis) against Dementia: Network Pharmacology and Computational Approach
Source: Hindawi journal article supplement (doi:10.1155/2022/1015310), 2022-10-03
Supplement: f1 [file 1015310.f1.zip]

## Targets for CP compounds

*PTGS1*

*PTGS2*

*ADRA2A*

*SLC6A3*

*ADRB2*

*SLC6A4*

*LTA4H*

*MAOB*

*MAOA*

*PRKACA*

*CHRM1*

*ADRA1A*

*DPP4*

*PKIA*

*MAOA*

*LYZ*

*CTRB*

*PLA2G2E*

*NOS3*

*TYR*

*CCL16*

*NOS2*

*AR*

*PPARG*

*HSP90AA1*

*PIK3CG*

*NCOA2*

*PRSSI*

*PGR*

*GABRA2*

*ACHE*

*SLC6A2*

*CHRM2*

*ADRA1B*

*GABRA1*

*TOP2A*

*F7*

*CALM*

*RELA*

*IKBKB*

*AKT1*

*BCL2*

*BAX*  
*TNF*  
*JUN*  
*AHSA1*  
*CASP3*  
*MAPK8*  
*XDH*  
*MMP1*  
*STAT1*  
*CDC2*  
*HMOX1*  
*CYP3A4*  
*CYP1A1*  
*ICAM1*  
*SELE*  
*VCAM1*  
*NR1I2*  
*CYP1B1*  
*ALOX5*  
*HAS2*  
*AHR*  
*PSMD3*  
*SLC2A4*  
*NR1I3*  
*INSR*  
*DIO1*  
*PPP3CA*  
*PRXC1A*  
*GSTM1*  
*GSTM2*  
*AKR1C3*  
*SLPI*  
*AKR1B1*  
*0*  
*KCNH2*  
*SCN5A*  
*F10*  
*MMP3*  
*RXRA*  
*MAO-B*  
*EGFR*  
*CCND1*  
*BCL2L1*  
*FOS*

*CDKN1A*  
*EIF6*  
*CASP9*  
*PLAU*  
*MMP2*  
*MMP9*  
*MAPK1*  
*IL10*  
*RB1*  
*IL6*  
*CDKN2A*  
*TP53*  
*ELK1*  
*NFKB1A*  
*ODC1*  
*CASP8*  
*TOP1*  
*RAF1*  
*SOD1*  
*PRKCA*  
*HIF1A*  
*RUNX1T1*  
*HERC5*  
*GRP78*  
*ERBB2*  
*ACACA*  
*CAV1*  
*MYC*  
*F3*  
*GJA1*  
*IL1B*  
*CCL2*  
*PTGER3*  
*CXCL8*  
*PRKCB*  
*BIRC5*  
*DUOX2*  
*HSPB1*  
*TGFB1*  
*MGAM*  
*IL2*  
*CCNB1*  
*PLAT*

*THBD*  
*SERPINE1*  
*IFNG*  
*PTEN*  
*IL1A*  
*MPO*  
*NCF1*  
*ABCG2*  
*NFE2L2*  
*NQO1*  
*PARP1*  
*COL3A1*  
*GYRB*  
*CXCL11*  
*CXCL2*  
*DCAF5*  
*CHEK2*  
*CLDN4*  
*PPARA*  
*PPARD*  
*HSF1*  
*CRP*  
*CXCL10*  
*CHUK*  
*SPP1*  
*RUNX2*  
*RASSF1*  
*E2F1*  
*E2F2*  
*ACP3*  
*CTSD*  
*IGFBP3*  
*IGF2*  
*CD40LG*  
*IRF1*  
*ERBB3*  
*PON1*  
*PCOLCE*  
*NPEPPS*  
*HK2*  
*NKX3-1*  
*RASA1*  
*NQO2*

*CA1*

*GRIA2*

*QTRT1*
