# Supplementary material for: Protective Mechanisms of Nootropic Herb Shankhpushpi (Convolvulus pluricaulis) against Dementia: Network Pharmacology and Computational Approach
Source: Hindawi journal article supplement (doi:10.1155/2022/1015310), 2022-10-03
Supplement: f1 [file 1015310.f1.zip]

**Table S4\_data for CP compound-target-disease network**

| <b>CP compounds' Targets</b> | <b>AD-associated target Genes</b> | <b>PD-associated target Genes</b> |
|------------------------------|-----------------------------------|-----------------------------------|
| <i>ABCG2</i>                 | <i>ABCG2</i>                      | <i>ABCG2</i>                      |
| <i>ACACA</i>                 | <i>ACACA</i>                      | <i>ACACA</i>                      |
| <i>ACHE</i>                  | <i>ACHE</i>                       | <i>ACHE</i>                       |
| <i>ACP3</i>                  | <i>ADRA1A</i>                     | <i>ACP3</i>                       |
| <i>ADRA1A</i>                | <i>ADRA2A</i>                     | <i>ADRB2</i>                      |
| <i>ADRA1B</i>                | <i>ADRB2</i>                      | <i>AHR</i>                        |
| <i>ADRA2A</i>                | <i>AHR</i>                        | <i>AHR</i>                        |
| <i>ADRB2</i>                 | <i>AHSA1</i>                      | <i>AHSA1</i>                      |
| <i>AHR</i>                   | <i>AKT1</i>                       | <i>AKT1</i>                       |
| <i>AHSA1</i>                 | <i>ALOX5</i>                      | <i>ALOX5</i>                      |
| <i>AKR1B10</i>               | <i>AR</i>                         | <i>AR</i>                         |
| <i>AKR1C3</i>                | <i>BAX</i>                        | <i>BAX</i>                        |
| <i>AKT1</i>                  | <i>BCL2</i>                       | <i>BCL2</i>                       |
| <i>ALOX5</i>                 | <i>CASP3</i>                      | <i>BCL2L1</i>                     |
| <i>AR</i>                    | <i>CASP8</i>                      | <i>CASP3</i>                      |
| <i>BAX</i>                   | <i>CASP9</i>                      | <i>CASP8</i>                      |
| <i>BCL2</i>                  | <i>CAV1</i>                       | <i>CASP9</i>                      |
| <i>BCL2L1</i>                | <i>CCL2</i>                       | <i>CAV1</i>                       |
| <i>BIRC5</i>                 | <i>CD40LG</i>                     | <i>CCL2</i>                       |
| <i>CA1</i>                   | <i>CDKN1A</i>                     | <i>CDKN1A</i>                     |
| <i>CALM</i>                  | <i>CDKN2A</i>                     | <i>CDKN2A</i>                     |
| <i>CASP3</i>                 | <i>CHRM1</i>                      | <i>COL3A1</i>                     |
| <i>CASP8</i>                 | <i>CHRM2</i>                      | <i>CP</i>                         |
| <i>CASP9</i>                 | <i>COL3A1</i>                     | <i>CRP</i>                        |
| <i>CAV1</i>                  | <i>CP</i>                         | <i>CTSD</i>                       |
| <i>CCL16</i>                 | <i>CRP</i>                        | <i>CXCL11</i>                     |
| <i>CCL2</i>                  | <i>CTSD</i>                       | <i>CXCL2</i>                      |
| <i>CCNB1</i>                 | <i>CXCL10</i>                     | <i>CXCL8</i>                      |
| <i>CCND1</i>                 | <i>CXCL11</i>                     | <i>CYP1A1</i>                     |
| <i>CD40LG</i>                | <i>CXCL2</i>                      | <i>CYP1B1</i>                     |
| <i>CDC2</i>                  | <i>CXCL8</i>                      | <i>CYP3A4</i>                     |
| <i>CDKN1A</i>                | <i>CYP3A4</i>                     | <i>DCAF5</i>                      |
| <i>CDKN2A</i>                | <i>E2F1</i>                       | <i>E2F1</i>                       |
| <i>CHEK2</i>                 | <i>EGFR</i>                       | <i>EGFR</i>                       |
| <i>CHRM1</i>                 | <i>ELK1</i>                       | <i>ERBB2</i>                      |
| <i>CHRM2</i>                 | <i>ERBB2</i>                      | <i>ERBB3</i>                      |
| <i>CHUK</i>                  | <i>F3</i>                         | <i>GRIA2</i>                      |
| <i>CLDN4</i>                 | <i>FOS</i>                        | <i>GSTM1</i>                      |
| <i>COL3A1</i>                | <i>GABRA2</i>                     | <i>GSTM2</i>                      |
| <i>CRP</i>                   | <i>GJA1</i>                       | <i>GYRB</i>                       |
| <i>CTRB</i>                  | <i>GRIA2</i>                      | <i>HAS2</i>                       |

|                 |                 |                 |
|-----------------|-----------------|-----------------|
| <i>CTSD</i>     | <i>GSTM1</i>    | <i>HAS2</i>     |
| <i>CXCL10</i>   | <i>GSTM2</i>    | <i>HIF1A</i>    |
| <i>CXCL11</i>   | <i>HIF1A</i>    | <i>HK2</i>      |
| <i>CXCL2</i>    | <i>HMOX1</i>    | <i>HMOX1</i>    |
| <i>CXCL8</i>    | <i>HSF1</i>     | <i>HSF1</i>     |
| <i>CYP1A1</i>   | <i>HSP90AA1</i> | <i>HSP90AA1</i> |
| <i>CYP1B1</i>   | <i>HSPB1</i>    | <i>HSPB1</i>    |
| <i>CYP3A4</i>   | <i>ICAM1</i>    | <i>ICAM1</i>    |
| <i>DCAF5</i>    | <i>IFNG</i>     | <i>IFNG</i>     |
| <i>DIO1</i>     | <i>IGF2</i>     | <i>IGF2</i>     |
| <i>DUOX2</i>    | <i>IGFBP3</i>   | <i>IKBKB</i>    |
| <i>E2F1</i>     | <i>IKBKB</i>    | <i>IL10</i>     |
| <i>E2F2</i>     | <i>IL10</i>     | <i>IL1A</i>     |
| <i>EGFR</i>     | <i>IL1A</i>     | <i>IL1B</i>     |
| <i>EIF6</i>     | <i>IL1B</i>     | <i>IL6</i>      |
| <i>ELK1</i>     | <i>IL6</i>      | <i>INSR</i>     |
| <i>ERBB2</i>    | <i>INSR</i>     | <i>MAOA</i>     |
| <i>ERBB3</i>    | <i>JUN</i>      | <i>MAOB</i>     |
| <i>F10</i>      | <i>LYZ</i>      | <i>MAPK1</i>    |
| <i>F3</i>       | <i>MAOA</i>     | <i>MAPK8</i>    |
| <i>F7</i>       | <i>MAOB</i>     | <i>MGAM</i>     |
| <i>FOS</i>      | <i>MAPK1</i>    | <i>MMP1</i>     |
| <i>GABRA1</i>   | <i>MAPK8</i>    | <i>MMP2</i>     |
| <i>GABRA2</i>   | <i>MGAM</i>     | <i>MMP9</i>     |
| <i>GJA1</i>     | <i>MMP1</i>     | <i>MPO</i>      |
| <i>GRIA2</i>    | <i>MMP2</i>     | <i>MYC</i>      |
| <i>GRP78</i>    | <i>MMP3</i>     | <i>NCF1</i>     |
| <i>GSTM1</i>    | <i>MMP9</i>     | <i>NFE2L2</i>   |
| <i>GSTM2</i>    | <i>MPO</i>      | <i>NFE2L2</i>   |
| <i>GYRB</i>     | <i>MYC</i>      | <i>NFKBIA</i>   |
| <i>HAS2</i>     | <i>NCF1</i>     | <i>NOS2</i>     |
| <i>HERC5</i>    | <i>NFE2L2</i>   | <i>NOS3</i>     |
| <i>HIF1A</i>    | <i>NOS2</i>     | <i>NPEPPS</i>   |
| <i>HK2</i>      | <i>NOS3</i>     | <i>NQO1</i>     |
| <i>HMOX1</i>    | <i>NPEPPS</i>   | <i>NQO1</i>     |
| <i>HSF1</i>     | <i>NQO1</i>     | <i>NQO2</i>     |
| <i>HSP90AA1</i> | <i>NQO2</i>     | <i>NR1I2</i>    |
| <i>HSPB1</i>    | <i>NR1I2</i>    | <i>NR1I3</i>    |
| <i>ICAM1</i>    | <i>NR1I3</i>    | <i>NR1I3</i>    |
| <i>IFNG</i>     | <i>PARP1</i>    | <i>PARP1</i>    |
| <i>IGF2</i>     | <i>PGR</i>      | <i>PARP1</i>    |
| <i>IGFBP3</i>   | <i>PIK3CG</i>   | <i>PIK3CG</i>   |
| <i>IKBKB</i>    | <i>PLAT</i>     | <i>PON1</i>     |

|                |                 |                 |
|----------------|-----------------|-----------------|
| <i>IL10</i>    | <i>PLAU</i>     | <i>PPARA</i>    |
| <i>IL1A</i>    | <i>PON1</i>     | <i>PPARD</i>    |
| <i>IL1B</i>    | <i>PPARA</i>    | <i>PPARG</i>    |
| <i>IL2</i>     | <i>PPARD</i>    | <i>PRKACA</i>   |
| <i>IL6</i>     | <i>PPARG</i>    | <i>PSMD3</i>    |
| <i>INSR</i>    | <i>PRKACA</i>   | <i>PTEN</i>     |
| <i>IRF1</i>    | <i>PRKCA</i>    | <i>PTGS2</i>    |
| <i>JUN</i>     | <i>PRKCB</i>    | <i>RB1</i>      |
| <i>KCNH2</i>   | <i>PSMD3</i>    | <i>RXRA</i>     |
| <i>LTA4H</i>   | <i>PTEN</i>     | <i>SELE</i>     |
| <i>LYZ</i>     | <i>PTGS1</i>    | <i>SERPINE1</i> |
| <i>MAOA</i>    | <i>PTGS2</i>    | <i>SLC2A4</i>   |
| <i>MAOA</i>    | <i>RAF1</i>     | <i>SLC2A4</i>   |
| <i>MAOB</i>    | <i>RASA1</i>    | <i>SLC6A2</i>   |
| <i>MAO-B</i>   | <i>RB1</i>      | <i>SLC6A3</i>   |
| <i>MAPK1</i>   | <i>RELA</i>     | <i>SLC6A4</i>   |
| <i>MAPK8</i>   | <i>RUNX1T1</i>  | <i>SOD1</i>     |
| <i>MGAM</i>    | <i>RXRA</i>     | <i>SPP1</i>     |
| <i>MMP1</i>    | <i>SELE</i>     | <i>STAT1</i>    |
| <i>MMP2</i>    | <i>SERPINE1</i> | <i>TGFB1</i>    |
| <i>MMP3</i>    | <i>SLC2A4</i>   | <i>TNF</i>      |
| <i>MMP9</i>    | <i>SLC6A2</i>   | <i>TOP2A</i>    |
| <i>MPO</i>     | <i>SLC6A3</i>   | <i>TP53</i>     |
| <i>MYC</i>     | <i>SLC6A4</i>   | <i>TYR</i>      |
| <i>NCF1</i>    | <i>SLPI</i>     | <i>VCAM1</i>    |
| <i>NCOA2</i>   | <i>SOD1</i>     |                 |
| <i>NFE2L2</i>  | <i>SPP1</i>     |                 |
| <i>NFKB1A</i>  | <i>STAT1</i>    |                 |
| <i>NKX3-1</i>  | <i>TGFB1</i>    |                 |
| <i>NOS2</i>    | <i>TNF</i>      |                 |
| <i>NOS3</i>    | <i>TP53</i>     |                 |
| <i>NPEPPS</i>  | <i>TYR</i>      |                 |
| <i>NQO1</i>    | <i>VCAM1</i>    |                 |
| <i>NQO2</i>    |                 |                 |
| <i>NR1I2</i>   |                 |                 |
| <i>NR1I3</i>   |                 |                 |
| <i>ODC1</i>    |                 |                 |
| <i>PARP1</i>   |                 |                 |
| <i>PCOLCE</i>  |                 |                 |
| <i>PGR</i>     |                 |                 |
| <i>PIK3CG</i>  |                 |                 |
| <i>PKIA</i>    |                 |                 |
| <i>PLA2G2E</i> |                 |                 |

*PLAT*  
*PLAU*  
*PONI*  
*PPARA*  
*PPARD*  
*PPARG*  
*PPP3CA*  
*PRKACA*  
*PRKCA*  
*PRKCB*  
*PRSSI*  
*PRXC1A*  
*PSMD3*  
*PTEN*  
*PTGER3*  
*PTGS1*  
*PTGS2*  
*QTRT1*  
*RAF1*  
*RASA1*  
*RASSF1*  
*RBI*  
*RELA*  
*RUNX1T1*  
*RUNX2*  
*RXRA*  
*SCN5A*  
*SELE*  
*SERPINE1*  
*SLC2A4*  
*SLC6A2*  
*SLC6A3*  
*SLC6A4*  
*SLPI*  
*SOD1*  
*SPP1*  
*STAT1*  
*TGFB1*  
*THBD*  
*TNF*  
*TOP1*  
*TOP2A*  
*TP53*

*TYR*

*VCAMI*

*XDH*

| Dementia-associated target Genes | Overlapping targets |
|----------------------------------|---------------------|
| <i>ACHE</i>                      | <i>ACHE</i>         |
| <i>AHR</i>                       | <i>AHR</i>          |
| <i>AKT1</i>                      | <i>AKT1</i>         |
| <i>BAX</i>                       | <i>BAX</i>          |
| <i>BCL2</i>                      | <i>BCL2</i>         |
| <i>CAV1</i>                      | <i>CAV1</i>         |
| <i>CDKN1A</i>                    | <i>CDKN1A</i>       |
| <i>CHRM1</i>                     | <i>CTSD</i>         |
| <i>CTSD</i>                      | <i>CXCL8</i>        |
| <i>CXCL10</i>                    | <i>E2F1</i>         |
| <i>CXCL8</i>                     | <i>EGFR</i>         |
| <i>E2F1</i>                      | <i>HMOX1</i>        |
| <i>EGFR</i>                      | <i>HSF1</i>         |
| <i>HMOX1</i>                     | <i>ICAM1</i>        |
| <i>HSF1</i>                      | <i>IFNG</i>         |
| <i>ICAM1</i>                     | <i>IGF2</i>         |
| <i>IFNG</i>                      | <i>IKBKB</i>        |
| <i>IGF2</i>                      | <i>IL10</i>         |
| <i>IGFBP3</i>                    | <i>IL1A</i>         |
| <i>IKBKB</i>                     | <i>IL1B</i>         |
| <i>IL10</i>                      | <i>IL6</i>          |
| <i>IL1A</i>                      | <i>INSR</i>         |
| <i>IL1B</i>                      | <i>MAOA</i>         |
| <i>IL6</i>                       | <i>MAPK1</i>        |
| <i>INSR</i>                      | <i>MMP2</i>         |
| <i>MAOA</i>                      | <i>MMP9</i>         |
| <i>MAPK1</i>                     | <i>MPO</i>          |
| <i>MMP2</i>                      | <i>NOS2</i>         |
| <i>MMP3</i>                      | <i>NOS3</i>         |
| <i>MMP9</i>                      | <i>NR1I2</i>        |
| <i>MPO</i>                       | <i>PIK3CG</i>       |
| <i>NOS2</i>                      | <i>PPARA</i>        |
| <i>NOS3</i>                      | <i>PPARG</i>        |
| <i>NR1I2</i>                     | <i>PTGS2</i>        |
| <i>PIK3CG</i>                    | <i>SELE</i>         |
| <i>PLAU</i>                      | <i>SERPINE1</i>     |
| <i>PPARA</i>                     | <i>SLC6A3</i>       |
| <i>PPARG</i>                     | <i>SOD1</i>         |
| <i>PPP3CA</i>                    | <i>SPP1</i>         |
| <i>PRKCB</i>                     | <i>STAT1</i>        |
| <i>PTGS2</i>                     | <i>TGFB1</i>        |

*SELE*  
*SERPINE1*  
*SLC6A3*  
*SOD1*  
*SPP1*  
*STAT1*  
*TGFB1*  
*TNF*  
*TP53*  
*VCAM1*

*TNF*  
*TP53*  
*VCAM1*
