# Supplementary material for: Protective Mechanisms of Nootropic Herb Shankhpushpi (Convolvulus pluricaulis) against Dementia: Network Pharmacology and Computational Approach
Source: Hindawi journal article supplement (doi:10.1155/2022/1015310), 2022-10-03
Supplement: f1 [file 1015310.f1.zip]

**Table S2\_QikProp ADMET of CP compounds**

| molecule            | #stars | #amine | #amidine | #acid | #amide | #rotor | #rtvFG | CNS |    |
|---------------------|--------|--------|----------|-------|--------|--------|--------|-----|----|
| Scopolin            | 0      | 0      | 0        | 0     | 0      | 0      | 8      | 2   | -2 |
| Convoline           | 0      | 1      | 0        | 0     | 0      | 0      | 5      | 2   | 1  |
| Convolam            | 0      | 1      | 0        | 0     | 0      | 0      | 4      | 1   | 1  |
| Convolvul           | 0      | 1      | 0        | 0     | 0      | 0      | 4      | 1   | 1  |
| Scopoletin          | 0      | 0      | 0        | 0     | 0      | 0      | 2      | 1   | 0  |
| Hydroxycit          | 0      | 0      | 0        | 1     | 0      | 0      | 4      | 1   | -2 |
| Kaempferol          | 0      | 0      | 0        | 0     | 0      | 0      | 4      | 0   | -2 |
| Quercetin           | 0      | 0      | 0        | 0     | 0      | 0      | 5      | 0   | -2 |
| Ayapanin            | 1      | 0      | 0        | 0     | 0      | 0      | 1      | 1   | 0  |
| Delphinidin         | 2      | 0      | 0        | 0     | 0      | 0      | 6      | 4   | -2 |
| Taraxerol           | 5      | 0      | 0        | 0     | 0      | 0      | 1      | 0   | 1  |
| $\beta$ -sitosterol | 6      | 0      | 0        | 0     | 0      | 0      | 7      | 0   | 0  |

a#Stars indicates the number of property or descriptor values that fall outside the 95% range

bRule of five indicates the number of violations of Lipinski's rule of five [3]. The rules are: mol\_

cRule of three indicates the number of violations of Jorgensen's rule of three. The three rules a

| mol_MW  | dipole | SASA    | FOSA    | FISA    | PISA    | WPSA   | volume   | donorHB |
|---------|--------|---------|---------|---------|---------|--------|----------|---------|
| 354.313 | 4.086  | 545.048 | 155.331 | 237.821 | 151.896 | 0      | 992.725  | 4       |
| 307.346 | 2.562  | 569.028 | 387.354 | 85.951  | 95.722  | 0      | 992.119  | 1       |
| 305.373 | 1.731  | 620.439 | 488.003 | 36.735  | 95.701  | 0      | 1059.573 | 0       |
| 291.346 | 1.348  | 553.508 | 403.298 | 60.676  | 89.534  | 0      | 958.939  | 1       |
| 192.171 | 7.41   | 377.41  | 89.124  | 116.981 | 171.304 | 0      | 610.457  | 1       |
| 164.16  | 3.449  | 376.676 | 25.371  | 168.922 | 182.382 | 0      | 585.13   | 2       |
| 286.24  | 4.588  | 503.264 | 0       | 237.585 | 265.68  | 0      | 839.699  | 3       |
| 302.24  | 4.899  | 514.002 | 0       | 284.18  | 229.822 | 0      | 860.567  | 4       |
| 176.171 | 5.261  | 366.516 | 91.898  | 72.055  | 202.564 | 0      | 584.993  | 0       |
| 338.701 | 1.532  | 490.29  | 160.796 | 247.136 | 56.973  | 25.385 | 720.222  | 2       |
| 426.724 | 1.906  | 684.569 | 634.721 | 36.439  | 13.409  | 0      | 1383.356 | 1       |
| 414.713 | 1.903  | 744.406 | 666.128 | 48.445  | 29.832  | 0      | 1444.693 | 1       |

of similar values for known drugs (ranging from 0 ? 5). A large number of stars suggests that a  
\_MW < 500, QPlogPo/w < 5, donor HB ≤5, accptHB ≤10. Compounds that satisfy these rules a  
are: QPlogS > -5.7, QP PCaco > 22 nm/s, # Primary Metabolites < 7. Compounds with fewer (a

| accptHB | dip^2/V  | ACxDN^5glob |          | QPpolrz | QPlogPC1 | QPlogPocl | QPlogPw | QPlogPo/v |
|---------|----------|-------------|----------|---------|----------|-----------|---------|-----------|
| 12.5    | 0.016816 | 0.045868    | 0.882978 | 29.889  | 11.215   | 22.842    | 20.088  | -0.949    |
| 6.7     | 0.006615 | 0.011775    | 0.845423 | 31.254  | 8.922    | 14.822    | 9.285   | 1.762     |
| 5.5     | 0.002826 | 0           | 0.810127 | 34.596  | 8.946    | 13.518    | 6.648   | 2.604     |
| 5       | 0.001895 | 0.009033    | 0.849641 | 30.509  | 8.391    | 13.482    | 7.58    | 2.368     |
| 4       | 0.089948 | 0.010599    | 0.922124 | 18.628  | 6.346    | 10.591    | 7.552   | 0.891     |
| 2.75    | 0.020334 | 0.010325    | 0.898186 | 16.436  | 6.518    | 9.807     | 7.771   | 1.419     |
| 4.5     | 0.025069 | 0.015487    | 0.855299 | 27.42   | 10.171   | 16.513    | 12.297  | 1.036     |
| 5.25    | 0.027893 | 0.020428    | 0.851249 | 27.27   | 10.666   | 18.489    | 14.379  | 0.362     |
| 3.25    | 0.047309 | 0           | 0.922939 | 18.55   | 5.762    | 7.981     | 5.45    | 1.044     |
| 1.5     | 0.003258 | 0.004327    | 0.792544 | 19.361  | 7.13     | 9.893     | 6.06    | 1.309     |
| 1.7     | 0.002627 | 0.002483    | 0.877076 | 48.694  | 11.563   | 18.2      | 4.624   | 7.066     |
| 1.7     | 0.002508 | 0.002284    | 0.830244 | 47.453  | 12.344   | 17.484    | 3.638   | 7.393     |

a molecule is less drug-like than molecules with few stars. The following properties and descriptors are considered drug-like (maximum is 4) and preferably no) violations of these rules are more likely to be orally available (maximum is 3

| QPlogS | CIQPlogS | QPlogHER | QPPCaco  | QPlogBB | QPPMDCK  | QPlogKp | IP(eV) | EA(eV) |
|--------|----------|----------|----------|---------|----------|---------|--------|--------|
| -1.677 | -2.342   | -4.15    | 55.036   | -1.952  | 21.535   | -4.599  | 9.572  | 1.182  |
| -2.234 | -2.159   | -5.216   | 378.204  | -0.141  | 191.338  | -4.349  | 9.835  | 0.517  |
| -3.083 | -2.344   | -5.787   | 1107.751 | 0.348   | 611.317  | -3.538  | 9.372  | 0.458  |
| -2.709 | -2.494   | -5.118   | 656.771  | 0.161   | 347.437  | -4.001  | 9.371  | 0.493  |
| -1.627 | -2.203   | -3.609   | 770.14   | -0.474  | 373.031  | -2.88   | 9.343  | 0.965  |
| -1.641 | -1.812   | -2.242   | 62.749   | -1.074  | 31.561   | -3.606  | 9.13   | 0.714  |
| -3.09  | -4.073   | -5.14    | 55.32    | -1.843  | 21.655   | -4.578  | 9.124  | 0.643  |
| -2.83  | -4.043   | -5.035   | 20       | -2.352  | 7.21     | -5.467  | 9.136  | 0.657  |
| -1.38  | -1.906   | -3.745   | 2054.026 | -0.061  | 1077.06  | -2.038  | 9.264  | 0.869  |
| -3.486 | -4.774   | -5.161   | 44.907   | -2.359  | 23.808   | -5.297  | 5.874  | -0.889 |
| -7.983 | -7.261   | -3.585   | 4470.446 | 0.187   | 2496.332 | -2.048  | 9.48   | -1.096 |
| -8.121 | -7.033   | -4.421   | 3439.51  | -0.327  | 1880.353 | -1.635  | 9.521  | -0.99  |

tors are included in the determination of #stars: MW, donorHB, accptHB, QPlogPw, QPlogPo/w

)

| #metab | QPlogKhsa | HumanOr | PercentHu | SAfluorine | SAamideC | PSA     | #NandO | RuleOfFive |
|--------|-----------|---------|-----------|------------|----------|---------|--------|------------|
| 5      | -0.933    | 2       | 52.544    | 0          | 0        | 148.954 | 9      | 0          |
| 2      | -0.18     | 3       | 83.398    | 0          | 0        | 76.197  | 6      | 0          |
| 3      | 0.053     | 3       | 96.685    | 0          | 0        | 52.78   | 5      | 0          |
| 2      | 0.102     | 3       | 91.236    | 0          | 0        | 62.507  | 5      | 0          |
| 2      | -0.49     | 3       | 83.826    | 0          | 0        | 70.484  | 4      | 0          |
| 1      | -0.672    | 3       | 67.426    | 0          | 0        | 74.003  | 3      | 0          |
| 4      | -0.201    | 3       | 64.205    | 0          | 0        | 120.544 | 6      | 0          |
| 5      | -0.354    | 2       | 52.348    | 0          | 0        | 141.943 | 7      | 0          |
| 1      | -0.596    | 3       | 92.348    | 0          | 0        | 49.178  | 3      | 0          |
| 7      | -0.129    | 2       | 51.222    | 0          | 0        | 100.299 | 7      | 1          |
| 2      | 2.06      | 1       | 100       | 0          | 0        | 19.72   | 1      | 1          |
| 3      | 1.974     | 1       | 100       | 0          | 0        | 22.243  | 1      | 1          |

/, QPlogS, QPlogKhsa, QPlogBB, #metabol.

| #ringatom | #in34 | #in56 | #noncon | #nonHatrr | RuleOfThr | Jm    |
|-----------|-------|-------|---------|-----------|-----------|-------|
| 16        | 0     | 16    | 5       | 25        | 0         | 0.188 |
| 14        | 0     | 14    | 7       | 22        | 0         | 0.08  |
| 14        | 0     | 14    | 7       | 22        | 0         | 0.053 |
| 14        | 0     | 14    | 7       | 21        | 0         | 0.056 |
| 10        | 0     | 10    | 0       | 14        | 0         | 6.263 |
| 6         | 0     | 6     | 0       | 12        | 0         | 1.306 |
| 16        | 0     | 16    | 0       | 21        | 0         | 0.006 |
| 16        | 0     | 16    | 0       | 22        | 1         | 0.002 |
| 10        | 0     | 10    | 0       | 13        | 0         | 81.26 |
| 18        | 14    | 4     | 12      | 23        | 1         | 0.001 |
| 22        | 0     | 22    | 20      | 31        | 1         | 0     |
| 17        | 0     | 17    | 15      | 30        | 1         | 0     |
