# Supplementary material for: Protective Mechanisms of Nootropic Herb Shankhpushpi (Convolvulus pluricaulis) against Dementia: Network Pharmacology and Computational Approach
Source: Hindawi journal article supplement (doi:10.1155/2022/1015310), 2022-10-03
Supplement: f1 [file 1015310.f1.zip]

**Table S1\_Target genes for molecular docking**

| Target Name | PDB ID |
|-------------|--------|
| PTGS2       | 5F19   |
| NOS3        | 1M9K   |
| PTGS1       | 3kk6   |
| INSR        | 1GAG   |
| NR1I3       | 1XV9   |
| NR1I2       | 1ILH   |
| HMOX1       | 1S8C   |
| ACHE        | 4EY6   |
| PIK3CG      | 2A4Z   |
| PPARG       | 7AWD   |
| MAOA        | 2Z5Y   |
| MAOB        | 2BYB   |
