# Supplementary material for: Protective Mechanisms of Nootropic Herb Shankhpushpi (Convolvulus pluricaulis) against Dementia: Network Pharmacology and Computational Approach
Source: Hindawi journal article supplement (doi:10.1155/2022/1015310), 2022-10-03
Supplement: f1 [file 1015310.f1.zip]

## Compound-Target\_network data

| Compounds              | Related target                                                   |
|------------------------|------------------------------------------------------------------|
| Scopoletin             | Prostaglandin G/H synthase 1                                     |
| Scopoletin             | Ribosyldihydronicotinamide dehydrogenase [quinone]               |
| Scopoletin             | Prostaglandin G/H synthase 2                                     |
| Scopoletin             | Carbonic anhydrase 1                                             |
| Scopoletin             | Beta-2 adrenergic receptor                                       |
| Scopoletin             | Leukotriene A-4 hydrolase                                        |
| Scopoletin             | Amine oxidase [flavin-containing] B                              |
| Scopoletin             | Glutamate receptor 2                                             |
| Scopoletin             | cAMP-dependent protein kinase catalytic subunit alpha            |
| Scopoletin             | Sodium-dependent noradrenaline transporter                       |
| Scopoletin             | Queuine tRNA-ribosyltransferase                                  |
| 4-Hydroxycinnamic acid | Prostaglandin G/H synthase 1                                     |
| 4-Hydroxycinnamic acid | Prostaglandin G/H synthase 2                                     |
| 4-Hydroxycinnamic acid | Amine oxidase [flavin-containing] B                              |
| 4-Hydroxycinnamic acid | Amine oxidase [flavin-containing] A                              |
| 4-Hydroxycinnamic acid | Lysozyme                                                         |
| 4-Hydroxycinnamic acid | Chymotrypsinogen B                                               |
| 4-Hydroxycinnamic acid | Group IIE secretory phospholipase A2                             |
| 4-Hydroxycinnamic acid | Nitric oxide synthase, endothelial                               |
| 4-Hydroxycinnamic acid | Tyrosinase                                                       |
| 4-Hydroxycinnamic acid | C-C motif chemokine 16                                           |
| Kaempferol             | Nitric oxide synthase, inducible                                 |
| Kaempferol             | Prostaglandin G/H synthase 1                                     |
| Kaempferol             | Androgen receptor                                                |
| Kaempferol             | Peroxisome proliferator-activated receptor gamma                 |
| Kaempferol             | Prostaglandin G/H synthase 2                                     |
| Kaempferol             | Heat shock protein HSP 90-alpha                                  |
| Kaempferol             | Phosphatidylinositol-4,5-bisphosphate 3-kinase catalytic subunit |
| Kaempferol             | cAMP-dependent protein kinase catalytic subunit alpha            |
| Kaempferol             | Nuclear receptor coactivator 2                                   |
| Kaempferol             | Trypsin-1                                                        |
| Kaempferol             | Progesterone receptor                                            |
| Kaempferol             | Muscarinic acetylcholine receptor M1                             |
| Kaempferol             | Nitric-oxide synthase, endothelial                               |
| Kaempferol             | Gamma-aminobutyric-acid receptor subunit alpha-2                 |
| Kaempferol             | Acetylcholinesterase                                             |
| Kaempferol             | Sodium-dependent noradrenaline transporter                       |
| Kaempferol             | Muscarinic acetylcholine receptor M2                             |
| Kaempferol             | Alpha-1B adrenergic receptor                                     |
| Kaempferol             | Gamma-aminobutyric-acid receptor subunit alpha-1                 |
| Kaempferol             | DNA topoisomerase 2-alpha                                        |

|            |                                                                   |
|------------|-------------------------------------------------------------------|
| Kaempferol | Coagulation factor VII                                            |
| Kaempferol | Calmodulin                                                        |
| Kaempferol | Transcription factor p65                                          |
| Kaempferol | Inhibitor of nuclear factor kappa-B kinase subunit beta           |
| Kaempferol | RAC-alpha serine/threonine-protein kinase                         |
| Kaempferol | Apoptosis regulator Bcl-2                                         |
| Kaempferol | Apoptosis regulator BAX                                           |
| Kaempferol | Tumor necrosis factor                                             |
| Kaempferol | Transcription factor AP-1                                         |
| Kaempferol | Activator of 90 kDa heat shock protein ATPase homolog 1           |
| Kaempferol | Caspase-3                                                         |
| Kaempferol | Mitogen-activated protein kinase 8                                |
| Kaempferol | Xanthine dehydrogenase/oxidase                                    |
| Kaempferol | Interstitial collagenase                                          |
| Kaempferol | Signal transducer and activator of transcription 1-alpha/beta     |
| Kaempferol | Cell division control protein 2 homolog                           |
| Kaempferol | Heme oxygenase 1                                                  |
| Kaempferol | Cytochrome P450 3A4                                               |
| Kaempferol | Cytochrome P450 1A1                                               |
| Kaempferol | Intercellular adhesion molecule 1                                 |
| Kaempferol | E-selectin                                                        |
| Kaempferol | Vascular cell adhesion protein 1                                  |
| Kaempferol | Nuclear receptor subfamily 1 group I member 2                     |
| Kaempferol | Cytochrome P450 1B1                                               |
| Kaempferol | Arachidonate 5-lipoxygenase                                       |
| Kaempferol | Hyaluronan synthase 2                                             |
| Kaempferol | Aryl hydrocarbon receptor                                         |
| Kaempferol | 26S proteasome non-ATPase regulatory subunit 3                    |
| Kaempferol | Solute carrier family 2, facilitated glucose transporter member 4 |
| Kaempferol | Nuclear receptor subfamily 1 group I member 3                     |
| Kaempferol | Insulin receptor                                                  |
| Kaempferol | Type I iodothyronine deiodinase                                   |
| Kaempferol | Serine/threonine-protein phosphatase 2B catalytic subunit alpha   |
| Kaempferol | Peroxidase C1A                                                    |
| Kaempferol | <u>Glutathione S-transferase Mu 1</u>                             |
| Kaempferol | Glutathione S-transferase Mu 2                                    |
| Kaempferol | Aldo-keto reductase family 1 member C3                            |
| Kaempferol | Antileukoprotease                                                 |
| Quercetin  | Prostaglandin G/H synthase 1                                      |
| Quercetin  | Androgen receptor                                                 |
| Quercetin  | Peroxisome proliferator-activated receptor gamma                  |
| Quercetin  | Prostaglandin G/H synthase 2                                      |
| Quercetin  | Heat shock protein HSP 90-alpha                                   |

|           |                                                                  |
|-----------|------------------------------------------------------------------|
| Quercetin | Phosphatidylinositol-4,5-bisphosphate 3-kinase catalytic subunit |
| Quercetin | Nuclear receptor coactivator 2                                   |
| Quercetin | Aldose reductase                                                 |
| Quercetin | Trypsin-1                                                        |
| Quercetin | DNA topoisomerase 2-alpha                                        |
| Quercetin | Potassium voltage-gated channel subfamily H member 2             |
| Quercetin | Sodium channel protein type 5 subunit alpha                      |
| Quercetin | Coagulation factor X                                             |
| Quercetin | Beta-2 adrenergic receptor                                       |
| Quercetin | Stromelysin-1                                                    |
| Quercetin | cAMP-dependent protein kinase catalytic subunit alpha            |
| Quercetin | Coagulation factor VII                                           |
| Quercetin | Nitric-oxide synthase, endothelial                               |
| Quercetin | Retinoic acid receptor RXR-alpha                                 |
| Quercetin | Acetylcholinesterase                                             |
| Quercetin | Gamma-aminobutyric-acid receptor subunit alpha-1                 |
| Quercetin | Amine oxidase [flavin-containing] B                              |
| Quercetin | Transcription factor p65                                         |
| Quercetin | Epidermal growth factor receptor                                 |
| Quercetin | RAC-alpha serine/threonine-protein kinase                        |
| Quercetin | G1/S-specific cyclin-D1                                          |
| Quercetin | Apoptosis regulator Bcl-2                                        |
| Quercetin | Bcl-2-like protein 1                                             |
| Quercetin | Proto-oncogene c-Fos                                             |
| Quercetin | Cyclin-dependent kinase inhibitor 1                              |
| Quercetin | Eukaryotic translation initiation factor 6                       |
| Quercetin | Apoptosis regulator BAX                                          |
| Quercetin | Caspase-9                                                        |
| Quercetin | Urokinase-type plasminogen activator                             |
| Quercetin | 72 kDa type IV collagenase                                       |
| Quercetin | Matrix metalloproteinase-9                                       |
| Quercetin | Mitogen-activated protein kinase 1                               |
| Quercetin | Interleukin-10                                                   |
| Quercetin | Retinoblastoma-associated protein                                |
| Quercetin | Tumor necrosis factor                                            |
| Quercetin | Transcription factor AP-1                                        |
| Quercetin | Interleukin-6                                                    |
| Quercetin | Cyclin-dependent kinase inhibitor 2A, isoforms 1/2/3             |
| Quercetin | Activator of 90 kDa heat shock protein ATPase homolog 1          |
| Quercetin | Caspase-3                                                        |
| Quercetin | Cellular tumor antigen p53                                       |
| Quercetin | ETS domain-containing protein Elk-1                              |
| Quercetin | NF-kappa-B inhibitor alpha                                       |
| Quercetin | Ornithine decarboxylase                                          |

|           |                                                               |
|-----------|---------------------------------------------------------------|
| Quercetin | Xanthine dehydrogenase/oxidase                                |
| Quercetin | Caspase-8                                                     |
| Quercetin | DNA topoisomerase 1                                           |
| Quercetin | RAF proto-oncogene serine/threonine-protein kinase            |
| Quercetin | Superoxide dismutase [Cu-Zn]                                  |
| Quercetin | Protein kinase C alpha type                                   |
| Quercetin | Interstitial collagenase                                      |
| Quercetin | Hypoxia-inducible factor 1-alpha                              |
| Quercetin | Signal transducer and activator of transcription 1-alpha/beta |
| Quercetin | Protein CBFA2T1                                               |
| Quercetin | Probable E3 ubiquitin-protein ligase HERC5                    |
| Quercetin | Cell division control protein 2 homolog                       |
| Quercetin | 78 kDa glucose-regulated protein                              |
| Quercetin | Receptor tyrosine-protein kinase erbB-2                       |
| Quercetin | Acetyl-CoA carboxylase 1                                      |
| Quercetin | Heme oxygenase 1                                              |
| Quercetin | Cytochrome P450 3A4                                           |
| Quercetin | Caveolin-1                                                    |
| Quercetin | Myc proto-oncogene protein                                    |
| Quercetin | Tissue factor                                                 |
| Quercetin | Gap junction alpha-1 protein                                  |
| Quercetin | Cytochrome P450 1A1                                           |
| Quercetin | Intercellular adhesion molecule 1                             |
| Quercetin | Interleukin-1 beta                                            |
| Quercetin | C-C motif chemokine ligand 2                                  |
| Quercetin | E-selectin                                                    |
| Quercetin | Vascular cell adhesion protein 1                              |
| Quercetin | Prostaglandin E2 receptor, EP3 subtype                        |
| Quercetin | Interleukin-8                                                 |
| Quercetin | Protein kinase C beta type                                    |
| Quercetin | Baculoviral IAP repeat-containing protein 5                   |
| Quercetin | Dual oxidase 2                                                |
| Quercetin | Nitric oxide synthase, endothelial                            |
| Quercetin | Heat shock protein beta-1                                     |
| Quercetin | Transforming growth factor beta-1                             |
| Quercetin | Maltase-glucoamylase, intestinal                              |
| Quercetin | Interleukin-2                                                 |
| Quercetin | Nuclear receptor subfamily 1 group I member 2                 |
| Quercetin | Cytochrome P450 1B1                                           |
| Quercetin | G2/mitotic-specific cyclin-B1                                 |
| Quercetin | Tissue-type plasminogen activator                             |
| Quercetin | Thrombomodulin                                                |
| Quercetin | Plasminogen activator inhibitor 1                             |

|           |                                                                   |
|-----------|-------------------------------------------------------------------|
| Quercetin | Interferon gamma                                                  |
| Quercetin | Arachidonate 5-lipoxygenase                                       |
| Quercetin | Phosphatidylinositol-3,4,5-trisphosphate 3-phosphatase and dual   |
| Quercetin | Interleukin-1 alpha                                               |
| Quercetin | Myeloperoxidase                                                   |
| Quercetin | DNA topoisomerase 2-alpha                                         |
| Quercetin | Neutrophil cytosol factor 1                                       |
| Quercetin | ATP-binding cassette sub-family G member 2                        |
| Quercetin | Hyaluronan synthase 2                                             |
| Quercetin | Nuclear factor erythroid 2-related factor 2                       |
| Quercetin | NAD(P)H dehydrogenase [quinone] 1                                 |
| Quercetin | Poly [ADP-ribose] polymerase 1                                    |
| Quercetin | Aryl hydrocarbon receptor                                         |
| Quercetin | 26S proteasome non-ATPase regulatory subunit 3                    |
| Quercetin | Solute carrier family 2, facilitated glucose transporter member 4 |
| Quercetin | Collagen alpha-1(III) chain                                       |
| Quercetin | DNA gyrase subunit B                                              |
| Quercetin | C-X-C motif chemokine 11                                          |
| Quercetin | C-X-C motif chemokine 2                                           |
| Quercetin | DDB1- and CUL4-associated factor 5                                |
| Quercetin | Nuclear receptor subfamily 1 group I member 3                     |
| Quercetin | Serine/threonine-protein kinase Chk2                              |
| Quercetin | Insulin receptor                                                  |
| Quercetin | Claudin-4                                                         |
| Quercetin | Peroxisome proliferator-activated receptor alpha                  |
| Quercetin | Peroxisome proliferator-activated receptor delta                  |
| Quercetin | Heat shock factor protein 1                                       |
| Quercetin | C-reactive protein                                                |
| Quercetin | C-X-C motif chemokine 10                                          |
| Quercetin | Inhibitor of nuclear factor kappa-B kinase subunit alpha          |
| Quercetin | Osteopontin                                                       |
| Quercetin | Runt-related transcription factor 2                               |
| Quercetin | Ras association domain-containing protein 1                       |
| Quercetin | Transcription factor E2F1                                         |
| Quercetin | Transcription factor E2F2                                         |
| Quercetin | Prostatic acid phosphatase                                        |
| Quercetin | Cathepsin D                                                       |
| Quercetin | Insulin-like growth factor-binding protein 3                      |
| Quercetin | Insulin-like growth factor II                                     |
| Quercetin | CD40 ligand                                                       |
| Quercetin | Interferon regulatory factor 1                                    |
| Quercetin | Receptor tyrosine-protein kinase erbB-3                           |
| Quercetin | Serum paraoxonase/arylesterase 1                                  |

|           |                                                       |
|-----------|-------------------------------------------------------|
| Quercetin | Type I iodothyronine deiodinase                       |
| Quercetin | Procollagen C-endopeptidase enhancer 1                |
| Quercetin | Puromycin-sensitive aminopeptidase                    |
| Quercetin | Hexokinase-2                                          |
| Quercetin | Homeobox protein Nkx-3.1                              |
| Quercetin | Ras GTPase-activating protein 1                       |
| Quercetin | Peroxidase C1A                                        |
| Quercetin | Glutathione S-transferase Mu 1                        |
| Quercetin | Glutathione S-transferase Mu 2                        |
| Ayapanin  | Prostaglandin G/H synthase 1                          |
| Ayapanin  | Prostaglandin G/H synthase 2                          |
| Ayapanin  | Alpha-2A adrenergic receptor                          |
| Ayapanin  | Sodium-dependent dopamine transporter                 |
| Ayapanin  | Beta-2 adrenergic receptor                            |
| Ayapanin  | Sodium-dependent serotonin transporter                |
| Ayapanin  | Leukotriene A-4 hydrolase                             |
| Ayapanin  | Amine oxidase [flavin-containing] B                   |
| Ayapanin  | Amine oxidase [flavin-containing] A                   |
| Ayapanin  | cAMP-dependent protein kinase catalytic subunit alpha |
| Ayapanin  | Muscarinic acetylcholine receptor M1                  |
| Ayapanin  | Alpha-1A adrenergic receptor                          |
| Ayapanin  | cAMP-dependent protein kinase inhibitor alpha         |

*Gene*

---

*PTGS1*

*NQO2*

*PTGS2*

*CA1*

*ADRB2*

*LTA4H*

*MAOB*

*GRIA2*

*PRKACA*

*SLC6A2*

*QTRT1*

*PTGS1*

*PTGS2*

*MAOB*

*MAOA*

*LYZ*

*CTRB*

*PLA2G2E*

*NOS3*

*TYR*

*CCL16*

*NOS2*

*PTGS1*

*AR*

*PPARG*

*PTGS2*

*HSP90AA1*

*PIK3CG*

*PRKACA*

*NCOA2*

*PRSS1*

*PGR*

*CHRM1*

*NOS3*

*GABRA2*

*ACHE*

*SLC6A2*

*CHRM2*

*ADRA1B*

*GABRA1*

*TOP2A*

*F7*  
*CALM*  
*RELA*  
*IKBKB*  
*AKT1*  
*BCL2*  
*BAX*  
*TNF*  
*JUN*  
*AHSA1*  
*CASP3*  
*MAPK8*  
*XDH*  
*MMP1*  
*STAT1*  
*CDC2*  
*HMOX1*  
*CYP3A4*  
*CYP1A1*  
*ICAM1*  
*SELE*  
*VCAM1*  
*NR1I2*  
*CYP1B1*  
*ALOX5*  
*HAS2*  
*AHR*  
*PSMD3*  
*SLC2A4*  
*NR1I3*  
*INSR*  
*DIO1*  
*PPP3CA*  
*PRXC1A*  
*GSTM1*  
*GSTM2*  
*AKR1C3*  
*SLPI*  
*PTGS1*  
*AR*  
*PPARG*  
*PTGS2*  
*HSP90AA1*



*PIK3CG*  
*NCOA2*  
*AKR1B1*  
*PRSS1*  
*TOP2A*  
*KCNH2*  
*SCN5A*  
*F10*  
*ADRB2*  
*MMP3*  
*PRKACA*  
*F7*  
*NOS3*  
*RXR4*  
*ACHE*  
*GABRA1*  
*MAO-B*  
*RELA*  
*EGFR*  
*AKT1*  
*CCND1*  
*BCL2*  
*BCL2L1*  
*FOS*  
*CDKN1A*  
*EIF6*  
*BAX*  
*CASP9*  
*PLAU*  
*MMP2*  
*MMP9*  
*MAPK1*  
*IL10*  
*RBI*  
*TNF*  
*JUN*  
*IL6*  
*CDKN2A*  
*AHSA1*  
*CASP3*  
*TP53*  
*ELK1*  
*NFKB1A*  
*ODC1*

*XDH*  
*CASP8*  
*TOP1*  
*RAF1*  
*SOD1*  
*PRKCA*  
*MMP1*  
*HIF1A*  
*STAT1*  
*RUNX1T1*  
*HERC5*  
*CDC2*  
*GRP78*  
*ERBB2*  
*ACACA*  
*HMOX1*  
*CYP3A4*  
*CAV1*  
*MYC*  
*F3*  
*GJA1*  
*CYP11A1*  
*ICAM1*  
*IL1B*  
*CCL2*  
*SELE*  
*VCAM1*  
*PTGER3*  
*CXCL8*  
*PRKCB*  
*BIRC5*  
*DUOX2*  
*NOS3*  
*HSPB1*  
*TGFB1*  
*MGAM*  
*IL2*  
*NR1I2*  
*CYP11B1*  
*CCNB1*  
*PLAT*  
*THBD*  
*SERPINE1*

*IFNG*  
*ALOX5*  
*PTEN*  
*IL1A*  
*MPO*  
*TOP2A*  
*NCF1*  
*ABCG2*  
*HAS2*  
*NFE2L2*  
*NQO1*  
*PARP1*  
*AHR*  
*PSMD3*  
*SLC2A4*  
*COL3A1*  
*GYRB*  
*CXCL11*  
*CXCL2*  
*DCAF5*  
*NR1I3*  
*CHEK2*  
*INSR*  
*CLDN4*  
*PPARA*  
*PPARD*  
*HSF1*  
*CRP*  
*CXCL10*  
*CHUK*  
*SPP1*  
*RUNX2*  
*RASSF1*  
*E2F1*  
*E2F2*  
*ACP3*  
*CTSD*  
*IGFBP3*  
*IGF2*  
*CD40LG*  
*IRF1*  
*ERBB3*  
*PON1*

*DIO1*  
*PCOLCE*  
*NPEPPS*  
*HK2*  
*NKX3-1*  
*RASA1*  
*PRXC1A*  
*GSTM1*  
*GSTM2*  
*PTGS1*  
*PTGS2*  
*ADRA2A*  
*SLC6A3*  
*ADRB2*  
*SLC6A4*  
*LTA4H*  
*MAOB*  
*MAOA*  
*PRKACA*  
*CHRM1*  
*ADRA1A*  
*PKIA*
