# Supplementary material for: Protective Mechanisms of Nootropic Herb Shankhpushpi (Convolvulus pluricaulis) against Dementia: Network Pharmacology and Computational Approach
Source: Hindawi journal article supplement (doi:10.1155/2022/1015310), 2022-10-03
Supplement: f1 [file 1015310.f1.zip]

**Table S5\_MM-GBSA free energy calculation result**

| title                  | r_psp_MMGBSA_dG_Bind | r_psp_MM | r_psp_MM | r_psp_MM |
|------------------------|----------------------|----------|----------|----------|
| <b>PTGS2</b>           |                      |          |          |          |
| Scopoletin             | -37.60080127         | -24.0079 | 1.629448 | -2.51947 |
| 4-Hydroxycinnamic acid | -27.86252475         | -13.4741 | 2.531961 | -1.2746  |
| Kaempferol             | -28.47589113         | -92.8469 | 1.329701 | -4.1141  |
| Quercetin              | -46.27227234         | -27.3642 | 0.853187 | -2.50654 |
| Ayapanin               | -32.98505574         | -3.88983 | 0.316931 | -0.00334 |
| <b>NOS3</b>            |                      |          |          |          |
| Scopoletin             | -34.98273163         | -34.0881 | 8.399126 | -2.81397 |
| 4-Hydroxycinnamic acid | -19.60096707         | -17.883  | 10.10579 | -0.9016  |
| Kaempferol             | 11.51092246          | 22.33073 | 3.787311 | -2.40728 |
| Quercetin              | -16.50613717         | -15.9065 | 8.026233 | -2.2576  |
| Ayapanin               | -15.62671476         | -13.1969 | 2.740368 | -0.54326 |
| <b>PTGS1</b>           |                      |          |          |          |
| Scopoletin             | -36.28116934         | -20.1373 | 2.369418 | -2.3742  |
| 4-Hydroxycinnamic acid | -30.48016405         | -13.4596 | -0.2206  | -1.00698 |
| Kaempferol             | -22.18027117         | -14.8471 | 2.431853 | -1.15623 |
| Quercetin              | -35.13088847         | -20.9816 | 2.826982 | -1.47805 |
| Ayapanin               | -27.17363778         | -5.70125 | -0.04662 | -0.63424 |
| <b>INSR</b>            |                      |          |          |          |
| Scopoletin             | 29.54110923          | -59.8973 | 6.344893 | -2.99235 |
| 4-Hydroxycinnamic acid | -21.4633956          | -21.7634 | 5.707014 | -1.04307 |
| Kaempferol             | 25.57890481          | -94.0004 | 4.271868 | -0.5289  |
| Quercetin              | 40.09119365          | -48.7411 | 4.381571 | -1.28588 |
| Ayapanin               | 50.06038707          | -32.4943 | 3.8994   | -0.05247 |
| <b>NR1I3</b>           |                      |          |          |          |
| Scopoletin             | -56.01405518         | -32.716  | 3.227228 | -0.82442 |
| 4-Hydroxycinnamic acid | -43.32734579         | -11.5825 | 3.284657 | -0.70903 |
| Kaempferol             | -13.70371972         | 48.40166 | 0.743822 | -0.62105 |
| Quercetin              | -49.91616587         | -23.3415 | 6.916772 | -0.85534 |
| Ayapanin               | -38.30447952         | -8.12912 | 1.918072 | -0.34857 |
| <b>NR1I2</b>           |                      |          |          |          |
| Scopoletin             | -39.13494472         | -18.7804 | 1.697287 | -2.04615 |
| 4-Hydroxycinnamic acid | -35.424107           | -8.19464 | 1.407724 | -0.56932 |
| Kaempferol             | -18.36887696         | -21.1222 | 3.15267  | -1.56746 |
| Quercetin              | -34.4923938          | -23.0771 | 1.771791 | -1.80474 |
| Ayapanin               | -36.3173049          | -3.55719 | 0.953462 | -0.40195 |
| <b>HMOX1</b>           |                      |          |          |          |
| Scopoletin             | -33.30092926         | -14.8675 | 1.267954 | -1.18965 |
| 4-Hydroxycinnamic acid | -36.2681757          | -7.21696 | 4.882745 | -1.80341 |

|                        |              |          |          |          |
|------------------------|--------------|----------|----------|----------|
| Kaempferol             | -16.96161664 | 20.48696 | 4.047998 | -0.9091  |
| Quercetin              | -34.20019731 | -2.44644 | 0.595982 | -1.12486 |
| Ayapanin               | -37.80482978 | -2.83636 | 0.345038 | -0.01697 |
| ACHE                   |              |          |          |          |
| Scopoletin             | -43.13985184 | -35.6414 | 3.805607 | -2.96885 |
| 4-Hydroxycinnamic acid | -39.80323709 | -16.4301 | 2.050396 | -1.35739 |
| Kaempferol             | -6.302466557 | 30.71241 | 1.444767 | -1.08961 |
| Quercetin              | 11.42716559  | -54.1566 | 1.454632 | -0.97734 |
| Ayapanin               | -41.44830429 | -11.281  | 3.996616 | -0.57415 |
| PPARG                  |              |          |          |          |
| Scopoletin             | -41.04259001 | -18.3711 | 2.700566 | -1.5804  |
| 4-Hydroxycinnamic acid | -48.89073968 | -20.5122 | 4.957828 | -2.55748 |
| Kaempferol             | -23.949427   | 52.44628 | 1.345164 | -2.70303 |
| Quercetin              | -4.977189325 | 3.410362 | 7.625514 | -2.74501 |
| Ayapanin               | -43.36886213 | -14.9081 | 0.568943 | -2.571   |
| MAOA                   |              |          |          |          |
| Scopoletin             | -51.18094319 | -38.4282 | 6.524859 | -2.599   |
| 4-Hydroxycinnamic acid | -28.06330989 | -11.2396 | 2.499148 | -0.56372 |
| Kaempferol             | -17.13274775 | -60.938  | 1.880354 | -2.05508 |
| Quercetin              | -13.93043484 | -144.824 | 3.355836 | -1.87068 |
| Ayapanin               | -34.58920552 | -11.8002 | -0.37647 | -0.81115 |
| MAOB                   |              |          |          |          |
| Scopoletin             | -34.04463499 | -25.534  | 5.074216 | -1.81288 |
| 4-Hydroxycinnamic acid | -46.57202698 | -20.1127 | 1.10706  | -2.04875 |
| Kaempferol             | -29.61393996 | -17.0671 | 0.515588 | -2.4847  |
| Quercetin              | -26.66736055 | -21.8723 | 4.352306 | -1.05466 |
| Ayapanin               | -38.57804154 | -17.3686 | 0.991407 | -0.93545 |
| TRKB                   |              |          |          |          |
| Scopoletin             | -34.67008334 | -33.9275 | 4.074114 | -2.97174 |
| 4-Hydroxycinnamic acid | -3.064918958 | 63.77819 | 0.702328 | -1.21878 |
| Kaempferol             | -14.75568473 | 70.67331 | 1.142954 | -0.82127 |
| Quercetin              | -8.792047271 | 50.72672 | -0.18959 | -1.15546 |
| Ayapanin               | -20.71866403 | -7.06861 | 0.071117 | -1.18657 |

r\_psp\_MM r\_psp\_MM r\_psp\_MM r\_psp\_MMGBSA\_d r\_psp\_MM r\_psp\_MMGBSA\_dG\_Bind\_vdW

|          |          |   |             |              |
|----------|----------|---|-------------|--------------|
| -12.5802 | -7.02736 | 0 | 44.3486788  | -37.44395313 |
| -9.95306 | -3.59866 | 0 | 19.31279528 | -21.4068473  |
| -7.40547 | -1.93389 | 0 | 99.29137362 | -22.79656923 |
| -12.5935 | -6.99743 | 0 | 38.42554806 | -36.08935459 |
| -14.1184 | -3.17024 | 0 | 20.72405917 | -32.84424878 |

|          |          |   |             |              |
|----------|----------|---|-------------|--------------|
| -23.784  | -10.4461 | 0 | 65.40657751 | -37.65629699 |
| -24.1046 | -13.3664 | 0 | 49.28372017 | -22.73481333 |
| -15.5275 | -3.65979 | 0 | 31.28716766 | -24.2996607  |
| -23.6625 | -10.3682 | 0 | 67.23010883 | -39.56768177 |
| -21.3063 | -10.1892 | 0 | 59.21008804 | -32.34154844 |

|          |          |   |             |              |
|----------|----------|---|-------------|--------------|
| -9.65533 | -2.28028 | 0 | 18.52582695 | -22.72932153 |
| -10.9741 | -1.70067 | 0 | 11.56195415 | -14.68016944 |
| -10.5853 | -0.45011 | 0 | 19.36209862 | -16.93547914 |
| -12.6633 | -1.61408 | 0 | 19.81448725 | -21.03529683 |
| -11.3242 | -2.72482 | 0 | 7.603422741 | -14.34592063 |

|          |          |   |             |              |
|----------|----------|---|-------------|--------------|
| -8.24639 | -0.75099 | 0 | 122.6901839 | -27.60691643 |
| -9.48269 | -0.05021 | 0 | 26.2782369  | -21.1092609  |
| -4.76638 | -0.0025  | 0 | 133.8469529 | -13.24177624 |
| -6.52768 | -0.17221 | 0 | 125.8359122 | -33.39942261 |
| -9.03666 | -1.08285 | 0 | 113.0689399 | -24.241687   |

|          |          |   |              |              |
|----------|----------|---|--------------|--------------|
| -17.8519 | -8.46615 | 0 | 32.39517505  | -31.77803757 |
| -15.0666 | -3.08682 | 0 | 12.0994791   | -28.26655045 |
| -13.4935 | -0.82168 | 0 | -23.48784178 | -24.42515986 |
| -18.1787 | -8.45282 | 0 | 26.94016599  | -32.94468973 |
| -14.4521 | -6.83483 | 0 | 13.40035291  | -23.85830412 |

|          |          |   |             |              |
|----------|----------|---|-------------|--------------|
| -10.5545 | -2.34245 | 0 | 27.94684364 | -35.05560552 |
| -14.0343 | -5.0438  | 0 | 16.29928604 | -25.28905552 |
| -9.48866 | -0.71943 | 0 | 31.82783355 | -20.45159766 |
| -11.4242 | -1.51082 | 0 | 28.95859993 | -27.4058992  |
| -15.8026 | -7.38885 | 0 | 13.07051233 | -23.19069921 |

|          |          |   |             |              |
|----------|----------|---|-------------|--------------|
| -12.4788 | -1.69268 | 0 | 29.34487256 | -33.68506656 |
| -13.1706 | -1.45092 | 0 | 10.36993301 | -27.87894804 |

|          |           |   |              |              |
|----------|-----------|---|--------------|--------------|
| -11.3937 | -3.36164  | 0 | -0.708400912 | -25.12377167 |
| -13.042  | -4.76816  | 0 | 21.09048933  | -34.50522381 |
| -17.2554 | -1.33342  | 0 | 9.958617473  | -26.66638224 |
| -16.679  | -9.41733  | 0 | 53.91635053  | -36.15516703 |
| -17.9412 | -3.89003  | 0 | 18.97489982  | -21.2097675  |
| -14.7908 | -2.11719  | 0 | 2.292442638  | -22.75447643 |
| -16.0645 | -7.28101  | 0 | 118.8769428  | -30.42498522 |
| -18.0383 | -6.26889  | 0 | 15.56259203  | -24.84516842 |
| -11.193  | -0.00042  | 0 | 23.52328067  | -36.12146719 |
| -17.0593 | -0.11744  | 0 | 19.61704645  | -33.21912139 |
| -15.1877 | -6.85E-08 | 0 | -34.30544776 | -25.54464384 |
| -11.7097 | -0.06091  | 0 | 35.37522453  | -36.87268002 |
| -16.1555 | -0.11111  | 0 | 19.47740798  | -29.66952654 |
| -17.4155 | -4.64806  | 0 | 38.4548227   | -33.06986119 |
| -14.107  | -3.06263  | 0 | 26.72262858  | -28.3121719  |
| -8.14396 | -0.24721  | 0 | 71.13610259  | -18.76496576 |
| -14.2025 | -4.56776  | 0 | 180.6300086  | -32.45104783 |
| -12.9757 | -2.36691  | 0 | 15.17812913  | -21.43689664 |
| -19.087  | -7.1224   | 0 | 48.75566116  | -34.31828995 |
| -15.0389 | -2.24718  | 0 | 19.86549234  | -28.09707433 |
| -12.0517 | -0.78364  | 0 | 33.41922975  | -31.16164865 |
| -19.0302 | -7.47096  | 0 | 51.55572713  | -33.1473081  |
| -15.4925 | -5.8915   | 0 | 28.20279299  | -28.08410154 |
| -8.10554 | -1.57066  | 0 | 25.16540229  | -17.33413994 |
| -2.9088  | -0.66417  | 0 | -46.16013787 | -16.59354906 |
| -8.6541  | -1.42434  | 0 | -59.65635821 | -16.01588134 |
| -6.27101 | -1.61373  | 0 | -32.59890602 | -17.69006388 |
| -6.43579 | -0.69238  | 0 | 11.53438437  | -16.94081014 |

r\_psp\_Lig\_ r\_psp\_Lig\_ r\_psp\_Lig\_ r\_psp\_Lig\_ r\_psp\_Lig\_ r\_psp\_Lig\_ r\_psp\_Lig\_ r\_psp\_Lig\_ r\_psp\_Lig\_

|          |          |          |   |          |   |   |          |
|----------|----------|----------|---|----------|---|---|----------|
| 3.593697 | -0.27072 | 1.629448 | 0 | 0.03662  | 0 | 0 | 0.271793 |
| 3.889341 | -0.43774 | 2.531961 | 0 | -0.00988 | 0 | 0 | 0.184856 |
| 1.123276 | -0.33775 | 1.329701 | 0 | -0.00194 | 0 | 0 | 0.079071 |
| 2.44133  | 0.071161 | 0.853187 | 0 | 0.018576 | 0 | 0 | 0.135665 |
| 0.391154 | -0.06883 | 0.316931 | 0 | -0.0015  | 0 | 0 | 0.069784 |

|          |          |          |   |          |   |   |          |
|----------|----------|----------|---|----------|---|---|----------|
| 8.421655 | -1.29888 | 8.401046 | 0 | -0.17358 | 0 | 0 | 0.858229 |
| 13.04285 | -0.44827 | 10.10771 | 0 | 0.021454 | 0 | 0 | 0.329626 |
| 3.835022 | -0.04854 | 3.789231 | 0 | 0.001786 | 0 | 0 | -0.07211 |
| 7.053094 | -2.12583 | 8.028153 | 0 | -0.14385 | 0 | 0 | 1.504379 |
| 2.204665 | -0.20509 | 2.742288 | 0 | -0.01194 | 0 | 0 | 0.048771 |

|          |          |          |   |          |   |   |          |
|----------|----------|----------|---|----------|---|---|----------|
| 1.750047 | 0.151381 | 2.369418 | 0 | -0.0093  | 0 | 0 | -0.51659 |
| 0.472665 | -1.66196 | -0.2206  | 0 | 0.04707  | 0 | 0 | 0.376863 |
| 2.106219 | -0.42543 | 2.431853 | 0 | -0.00375 | 0 | 0 | 0.100256 |
| 2.039645 | -0.11469 | 2.826982 | 0 | -0.02407 | 0 | 0 | -0.10034 |
| 0.312327 | -0.00207 | -0.04662 | 0 | -0.00122 | 0 | 0 | -0.00771 |

|          |          |          |   |          |   |   |          |
|----------|----------|----------|---|----------|---|---|----------|
| 7.860242 | -1.54875 | 6.344893 | 0 | 0.035552 | 0 | 0 | 0.560681 |
| 2.810139 | -2.83333 | 5.707014 | 0 | 0.008656 | 0 | 0 | 1.267137 |
| 3.74693  | -0.29231 | 4.271868 | 0 | -0.00393 | 0 | 0 | 0.059935 |
| 8.374856 | 11.16077 | 4.381571 | 0 | 0.00843  | 0 | 0 | -5.59037 |
| 2.866429 | -0.32994 | 3.8994   | 0 | -0.02269 | 0 | 0 | 0.15894  |

|          |          |          |   |          |   |   |          |
|----------|----------|----------|---|----------|---|---|----------|
| -1.39131 | -12.9253 | 3.227228 | 0 | -0.00124 | 0 | 0 | 5.430601 |
| 2.627443 | -1.02984 | 3.284657 | 0 | -0.003   | 0 | 0 | 0.407397 |
| 0.70904  | -0.00696 | 0.743822 | 0 | 0.002781 | 0 | 0 | 0.159564 |
| 6.042939 | -1.65355 | 6.916772 | 0 | 0.016431 | 0 | 0 | 0.176006 |
| 1.833748 | -0.13498 | 1.918072 | 0 | -0.00815 | 0 | 0 | 0.071906 |

|          |          |          |   |          |   |   |          |
|----------|----------|----------|---|----------|---|---|----------|
| 2.781416 | 1.021228 | 1.697287 | 0 | 0.04442  | 0 | 0 | -0.39869 |
| 2.242551 | 0.801287 | 1.407724 | 0 | -0.00261 | 0 | 0 | -0.20507 |
| 2.151454 | -0.22632 | 3.15267  | 0 | -0.01481 | 0 | 0 | -0.0043  |
| 2.624315 | -0.3859  | 1.771791 | 0 | 0.005566 | 0 | 0 | -0.06337 |
| 1.021946 | -0.17215 | 0.953462 | 0 | -0.00939 | 0 | 0 | 0.030991 |

|          |          |          |   |          |   |   |          |
|----------|----------|----------|---|----------|---|---|----------|
| 1.79695  | -0.73148 | 1.267954 | 0 | 0.012302 | 0 | 0 | 0.232677 |
| 3.819964 | 0.186719 | 4.882745 | 0 | 0.010976 | 0 | 0 | 0.334859 |

|          |          |          |   |          |   |   |          |
|----------|----------|----------|---|----------|---|---|----------|
| 3.686067 | -0.24101 | 4.047998 | 0 | -0.00012 | 0 | 0 | -0.07721 |
| 1.517634 | -0.52221 | 0.595982 | 0 | 0.017266 | 0 | 0 | 0.136673 |
| 0.44195  | -0.05821 | 0.345038 | 0 | 0.001004 | 0 | 0 | 0.032433 |
| 5.893616 | 1.33288  | 3.805607 | 0 | -0.02804 | 0 | 0 | -0.79114 |
| 1.709129 | 1.131472 | 2.050396 | 0 | -0.04466 | 0 | 0 | -0.34352 |
| 0.704432 | -0.13474 | 1.444767 | 0 | -0.00163 | 0 | 0 | -0.13198 |
| 3.295254 | -0.66673 | 1.454632 | 0 | 0.017594 | 0 | 0 | 0.692627 |
| 2.238664 | -0.39762 | 3.996616 | 0 | -0.02235 | 0 | 0 | -0.14563 |
| 1.958042 | 0.370501 | 2.700566 | 0 | -0.02645 | 0 | 0 | 0.150584 |
| 4.118316 | 0.062415 | 4.957828 | 0 | 0.022369 | 0 | 0 | 0.423004 |
| 2.469413 | 0.148929 | 1.345164 | 0 | -0.00068 | 0 | 0 | -0.01775 |
| 14.68475 | 9.59402  | 7.625514 | 0 | 0.00937  | 0 | 0 | -3.50904 |
| 0.583353 | -0.02223 | 0.568943 | 0 | -0.00022 | 0 | 0 | -0.01154 |
| 7.544325 | -0.66253 | 6.524859 | 0 | 0.00495  | 0 | 0 | -0.22628 |
| 1.877313 | -0.46649 | 2.499148 | 0 | -0.01868 | 0 | 0 | 0.135036 |
| 1.311722 | 0.307338 | 1.880354 | 0 | 0.002389 | 0 | 0 | -0.16574 |
| 4.593497 | -0.59073 | 3.355836 | 0 | 0.003707 | 0 | 0 | 0.271318 |
| 0.439279 | 0.008972 | -0.37647 | 0 | -0.00692 | 0 | 0 | -0.02658 |
| 6.580797 | -0.48576 | 5.074216 | 0 | -0.00478 | 0 | 0 | 0.067606 |
| 1.080078 | -0.31303 | 1.10706  | 0 | 0.000197 | 0 | 0 | 0.057241 |
| 0.759903 | -0.01532 | 0.515588 | 0 | 0.005655 | 0 | 0 | -0.11787 |
| 5.911443 | -0.17508 | 4.352306 | 0 | -0.00162 | 0 | 0 | -0.25293 |
| 0.580854 | 0.012615 | 0.991407 | 0 | -0.00542 | 0 | 0 | -0.39133 |
| 5.892353 | 0.044077 | 4.074114 | 0 | 0.019195 | 0 | 0 | -0.81269 |
| 0.570747 | -0.15078 | 0.702328 | 0 | -0.0009  | 0 | 0 | 0.071971 |
| 0.535588 | -0.10883 | 1.142954 | 0 | -0.00425 | 0 | 0 | 0.017565 |
| 1.413177 | 0.075765 | -0.18959 | 0 | 0.01033  | 0 | 0 | 0.133006 |
| 0.369962 | 0.025466 | 0.071117 | 0 | -0.00134 | 0 | 0 | 0.003957 |

r\_psp\_Lig\_r\_psp\_Ligar\_psp\_Ligar\_psp\_Ligar\_psp\_Ligar\_psp\_Ligar\_psp\_Ligar\_psp\_Liga

|          |          |          |          |   |          |   |   |          |
|----------|----------|----------|----------|---|----------|---|---|----------|
| 1.926554 | -72.832  | -88.6836 | 4.859055 | 0 | -1.57907 | 0 | 0 | -16.4495 |
| 1.620146 | -3.4652  | -21.2911 | 8.781064 | 0 | -0.87919 | 0 | 0 | -8.70711 |
| 0.054199 | -40.1272 | -23.3575 | 3.637854 | 0 | -0.44432 | 0 | 0 | -29.9182 |
| 1.362741 | -93.2695 | -108.753 | 4.193919 | 0 | -1.58484 | 0 | 0 | -14.7804 |
| 0.074768 | -21.0591 | -41.3902 | 8.37407  | 0 | -0.79794 | 0 | 0 | -5.86479 |

|          |          |          |          |   |          |   |   |          |
|----------|----------|----------|----------|---|----------|---|---|----------|
| 0.634846 | -71.005  | -88.0554 | 5.829505 | 0 | -1.5778  | 0 | 0 | -16.0871 |
| 3.032326 | -6.74481 | -26.4567 | 8.882972 | 0 | -0.87859 | 0 | 0 | -7.04816 |
| 0.164656 | -40.1686 | -23.458  | 3.638036 | 0 | -0.44438 | 0 | 0 | -29.8588 |
| -0.20976 | -97.7838 | -115.177 | 2.10862  | 0 | -1.57529 | 0 | 0 | -11.4671 |
| -0.36937 | -21.0867 | -41.3898 | 8.375472 | 0 | -0.79793 | 0 | 0 | -5.8926  |

|          |          |          |          |   |          |   |   |          |
|----------|----------|----------|----------|---|----------|---|---|----------|
| -0.24487 | -73.773  | -89.4568 | 3.419707 | 0 | -1.57007 | 0 | 0 | -14.8351 |
| 1.93129  | -2.18903 | -24.0206 | 13.15326 | 0 | -0.85297 | 0 | 0 | -7.67943 |
| 0.003291 | -40.1296 | -23.4582 | 3.638364 | 0 | -0.44435 | 0 | 0 | -29.8198 |
| -0.54824 | -97.8255 | -115.173 | 2.121094 | 0 | -1.57541 | 0 | 0 | -11.5084 |
| 0.369956 | -21.0853 | -41.3897 | 8.374927 | 0 | -0.79794 | 0 | 0 | -5.89114 |

|          |          |          |          |   |          |   |   |          |
|----------|----------|----------|----------|---|----------|---|---|----------|
| 2.467866 | -69.1218 | -81.5581 | 5.581091 | 0 | -1.58064 | 0 | 0 | -19.2779 |
| -1.33934 | -3.57465 | -21.2899 | 8.780565 | 0 | -0.87919 | 0 | 0 | -8.81742 |
| -0.28863 | -40.0659 | -23.3589 | 3.639567 | 0 | -0.44434 | 0 | 0 | -29.8554 |
| -1.58554 | -94.0183 | -112.056 | 4.277609 | 0 | -1.58467 | 0 | 0 | -12.3104 |
| -0.83929 | -21.1414 | -41.3895 | 8.375282 | 0 | -0.79793 | 0 | 0 | -5.94733 |

|          |          |          |          |   |          |   |   |          |
|----------|----------|----------|----------|---|----------|---|---|----------|
| 2.877413 | -66.2525 | -77.8257 | 6.550317 | 0 | -1.57976 | 0 | 0 | -20.8975 |
| -0.03176 | -3.57569 | -21.29   | 8.78227  | 0 | -0.87918 | 0 | 0 | -8.81898 |
| -0.19016 | -40.2342 | -23.3583 | 3.638481 | 0 | -0.44433 | 0 | 0 | -30.0241 |
| 0.587281 | -93.3596 | -107.8   | 2.934128 | 0 | -1.57722 | 0 | 0 | -14.0799 |
| -0.0131  | -21.1048 | -41.3897 | 8.374908 | 0 | -0.79794 | 0 | 0 | -5.91072 |

|          |          |          |          |   |          |   |   |          |
|----------|----------|----------|----------|---|----------|---|---|----------|
| 0.417168 | -71.6164 | -87.277  | 4.630893 | 0 | -1.56965 | 0 | 0 | -15.7637 |
| 0.241218 | -6.80507 | -26.4547 | 8.88221  | 0 | -0.87859 | 0 | 0 | -7.10846 |
| -0.75578 | -40.128  | -23.4585 | 3.639798 | 0 | -0.44438 | 0 | 0 | -29.8186 |
| 1.296233 | -88.8996 | -99.963  | 4.929884 | 0 | -1.58719 | 0 | 0 | -18.538  |
| 0.219023 | -20.7893 | -41.4269 | 8.410461 | 0 | -0.79761 | 0 | 0 | -5.54202 |

|          |          |          |          |   |          |   |   |          |
|----------|----------|----------|----------|---|----------|---|---|----------|
| 1.015501 | -70.7623 | -83.8226 | 3.550148 | 0 | -1.57051 | 0 | 0 | -17.2185 |
| -1.59534 | -6.78081 | -26.4559 | 8.882673 | 0 | -0.87859 | 0 | 0 | -7.08418 |

|          |          |          |          |   |          |   |   |          |
|----------|----------|----------|----------|---|----------|---|---|----------|
| -0.04359 | -40.0247 | -23.4584 | 3.636875 | 0 | -0.44437 | 0 | 0 | -29.7136 |
| 1.289927 | -97.7591 | -115.177 | 2.116178 | 0 | -1.57533 | 0 | 0 | -11.4425 |
| 0.121681 | -20.8463 | -41.4265 | 8.409915 | 0 | -0.79761 | 0 | 0 | -5.59927 |
|          |          |          |          |   |          |   |   |          |
| 1.574309 | -66.4574 | -79.0542 | 6.680449 | 0 | -1.58004 | 0 | 0 | -19.9402 |
| -1.08456 | -2.88852 | -25.6282 | 11.73404 | 0 | -0.80451 | 0 | 0 | -7.08414 |
| -0.47199 | -39.9421 | -23.3585 | 3.637273 | 0 | -0.44432 | 0 | 0 | -29.731  |
| 1.797127 | -98.8983 | -78.5727 | 5.080002 | 0 | -0.82022 | 0 | 0 | -50.9821 |
| -1.19235 | -20.7913 | -41.4269 | 8.410051 | 0 | -0.79762 | 0 | 0 | -5.544   |
|          |          |          |          |   |          |   |   |          |
| -1.23716 | -74.8498 | -91.0131 | 3.5786   | 0 | -1.57019 | 0 | 0 | -14.4814 |
| -1.3473  | -6.84418 | -26.4549 | 8.882944 | 0 | -0.87859 | 0 | 0 | -7.14804 |
| 0.993748 | -40.1608 | -23.3576 | 3.638047 | 0 | -0.44432 | 0 | 0 | -29.9512 |
| 0.96489  | -105.574 | -91.3286 | 4.313658 | 0 | -0.8196  | 0 | 0 | -45.8348 |
| 0.048398 | -20.7988 | -41.4266 | 8.410396 | 0 | -0.79761 | 0 | 0 | -5.55161 |
|          |          |          |          |   |          |   |   |          |
| 1.90333  | -65.2488 | -74.5121 | 5.434823 | 0 | -1.57987 | 0 | 0 | -22.0583 |
| -0.2717  | -3.62155 | -21.2899 | 8.781651 | 0 | -0.87917 | 0 | 0 | -8.86454 |
| -0.71262 | -40.1897 | -23.4582 | 3.639655 | 0 | -0.44439 | 0 | 0 | -29.8798 |
| 1.553361 | -98.6199 | -78.5751 | 5.077234 | 0 | -0.82024 | 0 | 0 | -50.703  |
| 0.84028  | -21.0272 | -41.3903 | 8.375581 | 0 | -0.79793 | 0 | 0 | -5.83273 |
|          |          |          |          |   |          |   |   |          |
| 1.929521 | -67.8468 | -78.7019 | 5.592672 | 0 | -1.58164 | 0 | 0 | -20.7777 |
| 0.228613 | -3.58568 | -21.2898 | 8.780498 | 0 | -0.87919 | 0 | 0 | -8.82842 |
| 0.371848 | -40.0709 | -23.3579 | 3.636484 | 0 | -0.44431 | 0 | 0 | -29.8602 |
| 1.988765 | -87.9816 | -98.4472 | 4.932465 | 0 | -1.5873  | 0 | 0 | -19.1236 |
| -0.02643 | -20.7709 | -41.4269 | 8.411352 | 0 | -0.79761 | 0 | 0 | -5.5236  |
|          |          |          |          |   |          |   |   |          |
| 2.567658 | -71.5997 | -87.1419 | 4.660799 | 0 | -1.57058 | 0 | 0 | -15.8847 |
| -0.05187 | -36.5224 | -23.9587 | 8.627959 | 0 | -0.17766 | 0 | 0 | -40.4862 |
| -0.51184 | -40.1948 | -23.4577 | 3.63878  | 0 | -0.44437 | 0 | 0 | -29.8859 |
| 1.383664 | -98.6127 | -78.5807 | 5.084493 | 0 | -0.82024 | 0 | 0 | -50.6914 |
| 0.27076  | -20.8088 | -41.4267 | 8.410299 | 0 | -0.79761 | 0 | 0 | -5.56159 |



r\_psp\_Ligar\_psp\_Ligar\_psp\_Con r\_psp\_Con r\_psp\_Con r\_psp\_Con r\_psp\_Con r\_psp\_Con r\_psp\_Con

|          |          |          |          |          |          |          |          |
|----------|----------|----------|----------|----------|----------|----------|----------|
| 29.02112 | -45830   | -34553   | 4869.544 | -726.878 | -3106.75 | -195.796 | -132.016 |
| 18.63116 | -45750.9 | -34475   | 4874.369 | -725.633 | -3103.42 | -192.367 | -132.016 |
| 9.954917 | -45788.2 | -34556.5 | 4868.023 | -728.472 | -3100.44 | -190.702 | -132.016 |
| 27.65505 | -45859.2 | -34576.4 | 4868.103 | -726.865 | -3106.77 | -195.766 | -132.016 |
| 18.61977 | -45773.7 | -34485.6 | 4871.747 | -724.361 | -3107.51 | -191.939 | -132.016 |

|          |          |          |          |          |          |          |          |
|----------|----------|----------|----------|----------|----------|----------|----------|
| 28.88586 | -33008.5 | -24821   | 3438     | -467.818 | -2211.46 | -147.025 | -76.6085 |
| 18.75567 | -32928.9 | -24743.2 | 3442.76  | -465.906 | -2211.08 | -149.945 | -76.6085 |
| 9.954588 | -32931.2 | -24700   | 3431.197 | -467.412 | -2202.07 | -140.239 | -76.6085 |
| 28.32726 | -33016.8 | -24830   | 3433.906 | -467.262 | -2211.33 | -146.947 | -76.6085 |
| 18.61815 | -32939.2 | -24753.5 | 3434.887 | -465.548 | -2208.2  | -146.768 | -76.6085 |

|          |          |          |          |          |          |          |          |
|----------|----------|----------|----------|----------|----------|----------|----------|
| 28.66934 | -41455.3 | -33598.8 | 5534.38  | -613.245 | -3338.66 | -202.556 | -78.1593 |
| 17.21071 | -41378   | -33526.7 | 5541.523 | -611.878 | -3339.26 | -201.976 | -78.1593 |
| 9.954478 | -41407.6 | -33527.5 | 5534.661 | -612.027 | -3338.46 | -200.726 | -78.1593 |
| 28.31006 | -41478.2 | -33625.4 | 5533.539 | -612.349 | -3341.67 | -201.89  | -78.1593 |
| 18.61858 | -41393.5 | -33536.3 | 5536.919 | -611.505 | -3339.55 | -203.001 | -78.1593 |

|          |          |          |          |          |          |          |          |
|----------|----------|----------|----------|----------|----------|----------|----------|
| 27.7138  | -12655.6 | -9517.26 | 1116.982 | -175.097 | -692.358 | -21.1818 | -15.0219 |
| 18.63126 | -12641   | -9418.86 | 1119.544 | -173.148 | -692.893 | -20.481  | -15.0219 |
| 9.953174 | -12630.5 | -9493.17 | 1112.968 | -172.634 | -687.742 | -20.4333 | -15.0219 |
| 27.65542 | -12669.9 | -9536.6  | 1113.715 | -173.391 | -690.644 | -20.603  | -15.0219 |
| 18.61801 | -12587.1 | -9449.69 | 1117.331 | -172.157 | -692.366 | -21.5137 | -15.0219 |

|          |          |          |          |          |          |          |          |
|----------|----------|----------|----------|----------|----------|----------|----------|
| 27.50024 | -40457.9 | -30109.1 | 4500.038 | -597.516 | -2549.16 | -86.5731 | -30.8559 |
| 18.63018 | -40382.6 | -30031.4 | 4502.327 | -597.401 | -2545.68 | -81.1937 | -30.8559 |
| 9.954067 | -40389.6 | -29973.5 | 4494.643 | -597.313 | -2543.67 | -78.9286 | -30.8559 |
| 27.16317 | -40478.9 | -30129.7 | 4500.111 | -597.547 | -2549.49 | -86.5597 | -30.8559 |
| 18.61865 | -40395.1 | -30048.1 | 4500.553 | -597.04  | -2544.98 | -84.9417 | -30.8559 |

|          |          |          |          |          |          |          |          |
|----------|----------|----------|----------|----------|----------|----------|----------|
| 28.36313 | -10623.7 | -8705.83 | 1227.903 | -160.958 | -656.856 | -31.9882 | -5.21211 |
| 18.75446 | -10555.2 | -8634.43 | 1231.865 | -159.481 | -659.645 | -34.6896 | -5.21211 |
| 9.953642 | -10571.4 | -8644.36 | 1228.367 | -160.479 | -654.665 | -30.3652 | -5.21211 |
| 26.25863 | -10636.3 | -8722.82 | 1228.277 | -160.717 | -657.744 | -31.1566 | -5.21211 |
| 18.56674 | -10570   | -8644.76 | 1230.939 | -159.314 | -661.332 | -37.0346 | -5.21211 |

|          |          |          |          |          |          |          |          |
|----------|----------|----------|----------|----------|----------|----------|----------|
| 28.29915 | -36133.7 | -27270.1 | 3762.862 | -532.987 | -2177.21 | -74.3516 | -71.0338 |
| 18.75513 | -36072.6 | -27205   | 3771.809 | -533.601 | -2177.21 | -74.1098 | -71.0338 |

|          |          |          |          |          |          |          |          |
|----------|----------|----------|----------|----------|----------|----------|----------|
| 9.954773 | -36086.6 | -27174.3 | 3765.728 | -532.707 | -2175    | -76.0206 | -71.0338 |
| 28.31951 | -36161.6 | -27289   | 3760.756 | -532.922 | -2177.78 | -77.4271 | -71.0338 |
| 18.56717 | -36088.3 | -27215.6 | 3766.799 | -531.814 | -2181.22 | -73.9923 | -71.0338 |
| 27.4366  | -42411.2 | -32545.8 | 4362.182 | -651.201 | -3121.47 | -137.258 | -105.836 |
| 18.89428 | -42344.3 | -32473.1 | 4365.48  | -649.59  | -3121.96 | -131.731 | -105.836 |
| 9.954495 | -42347.9 | -32423.7 | 4356.778 | -649.322 | -3118.45 | -129.958 | -105.836 |
| 26.39669 | -42389.1 | -32563.8 | 4358.231 | -649.21  | -3120.1  | -135.122 | -105.836 |
| 18.56714 | -42363.9 | -32483.8 | 4364.103 | -648.806 | -3122.05 | -134.11  | -105.836 |
| 28.63629 | -11651.8 | -8159.08 | 981.5449 | -179.877 | -667.164 | -15.867  | -20.6568 |
| 18.75439 | -11591.7 | -8096.66 | 989.1065 | -180.854 | -672.339 | -15.984  | -20.6568 |
| 9.954288 | -11600   | -8020.6  | 980.2489 | -180.999 | -670.033 | -15.8666 | -20.6568 |
| 28.09578 | -11646.5 | -8137.61 | 987.2049 | -181.041 | -666.93  | -15.9275 | -20.6568 |
| 18.56669 | -11600.1 | -8106.03 | 984.2451 | -180.867 | -671.354 | -15.9777 | -20.6568 |
| 27.46654 | -21548.1 | -15887.6 | 2271.379 | -338.674 | -1375.74 | -67.9406 | -31.9887 |
| 18.63037 | -21463.4 | -15807.2 | 2270.7   | -336.639 | -1371.73 | -66.3551 | -31.9887 |
| 9.953127 | -21489   | -15859   | 2264.94  | -338.13  | -1365.34 | -63.5397 | -31.9887 |
| 26.40118 | -21544.2 | -15998   | 2267.853 | -337.946 | -1371.77 | -67.8603 | -31.9887 |
| 18.61816 | -21487.3 | -15827.8 | 2267.419 | -336.886 | -1370.52 | -65.6594 | -31.9887 |
| 27.62177 | -40858.6 | -30436.8 | 4280.917 | -653.316 | -2436.15 | -98.6967 | -51.506  |
| 18.63125 | -40806.8 | -30374   | 4280.138 | -653.552 | -2431.4  | -93.8215 | -51.506  |
| 9.955103 | -40826.4 | -30373   | 4274.402 | -653.988 | -2427.97 | -92.3579 | -51.506  |
| 26.24405 | -40871.3 | -30452.9 | 4279.535 | -652.558 | -2436.1  | -99.0452 | -51.506  |
| 18.56583 | -40816   | -30391.4 | 4279.653 | -652.438 | -2431.77 | -97.4658 | -51.506  |
| 28.33662 | -4090.6  | -3047.38 | 593.7031 | -47.4382 | -230.697 | -12.4225 | -24.4398 |
| 19.47219 | -4023.92 | -2886.5  | 594.2985 | -45.6852 | -224.107 | -11.516  | -24.4398 |
| 9.954281 | -4039.28 | -2879.1  | 589.7499 | -45.2877 | -230.119 | -12.2761 | -24.4398 |
| 26.39506 | -4091.74 | -2954.17 | 589.8631 | -45.6219 | -228.112 | -12.4655 | -24.4398 |
| 18.56685 | -4025.86 | -2974.81 | 593.4496 | -45.653  | -228.254 | -11.5442 | -24.4398 |

r\_psp\_Con r\_psp\_Con r\_psp\_Con r\_psp\_Liga r\_psp\_Liga r\_psp\_Liga r\_psp\_Liga r\_psp\_Liga

|          |          |          |          |          |   |          |   |
|----------|----------|----------|----------|----------|---|----------|---|
| -5570.26 | -6414.92 | -72.832  | -88.6836 | 4.859055 | 0 | -1.57907 | 0 |
| -5587.55 | -6409.27 | -3.4652  | -21.2911 | 8.781064 | 0 | -0.87919 | 0 |
| -5528.78 | -6419.33 | -40.1272 | -23.3575 | 3.637854 | 0 | -0.44432 | 0 |
| -5574.51 | -6414.93 | -93.2695 | -108.753 | 4.193919 | 0 | -1.58484 | 0 |
| -5583.3  | -6420.72 | -21.0591 | -41.3902 | 8.37407  | 0 | -0.79794 | 0 |
| -4212.06 | -4510.51 | -71.005  | -88.0554 | 5.829505 | 0 | -1.5778  | 0 |
| -4219.15 | -4505.72 | -6.74481 | -26.4567 | 8.882972 | 0 | -0.87859 | 0 |
| -4259.96 | -4516.08 | -40.1686 | -23.458  | 3.638036 | 0 | -0.44438 | 0 |
| -4205.62 | -4512.98 | -97.7838 | -115.177 | 2.10862  | 0 | -1.57529 | 0 |
| -4208.07 | -4515.46 | -21.0867 | -41.3898 | 8.375472 | 0 | -0.79793 | 0 |
| -3983.59 | -5174.69 | -73.773  | -89.4568 | 3.419707 | 0 | -1.57007 | 0 |
| -3983.39 | -5178.1  | -2.18903 | -24.0206 | 13.15326 | 0 | -0.85297 | 0 |
| -3997.73 | -5187.61 | -40.1296 | -23.4582 | 3.638364 | 0 | -0.44435 | 0 |
| -3978.97 | -5173.35 | -97.8255 | -115.173 | 2.121094 | 0 | -1.57541 | 0 |
| -3985.56 | -5176.35 | -21.0853 | -41.3897 | 8.374927 | 0 | -0.79794 | 0 |
| -2017.68 | -1333.94 | -69.1218 | -81.5581 | 5.581091 | 0 | -1.58064 | 0 |
| -2103.64 | -1336.52 | -3.57465 | -21.2899 | 8.780565 | 0 | -0.87919 | 0 |
| -2017.11 | -1337.34 | -40.0659 | -23.3589 | 3.639567 | 0 | -0.44434 | 0 |
| -2007.57 | -1339.79 | -94.0183 | -112.056 | 4.277609 | 0 | -1.58467 | 0 |
| -2013.98 | -1339.67 | -21.1414 | -41.3895 | 8.375282 | 0 | -0.79793 | 0 |
| -6628.77 | -4956.01 | -66.2525 | -77.8257 | 6.550317 | 0 | -1.57976 | 0 |
| -6636.99 | -4961.37 | -3.57569 | -21.29   | 8.78227  | 0 | -0.87918 | 0 |
| -6693.78 | -4966.2  | -40.2342 | -23.3583 | 3.638481 | 0 | -0.44433 | 0 |
| -6627.41 | -4957.51 | -93.3596 | -107.8   | 2.934128 | 0 | -1.57722 | 0 |
| -6632.78 | -4956.97 | -21.1048 | -41.3897 | 8.374908 | 0 | -0.79794 | 0 |
| -1194.04 | -1096.69 | -71.6164 | -87.277  | 4.630893 | 0 | -1.56965 | 0 |
| -1197.03 | -1096.53 | -6.80507 | -26.4547 | 8.88221  | 0 | -0.87859 | 0 |
| -1204.21 | -1100.5  | -40.128  | -23.4585 | 3.639798 | 0 | -0.44438 | 0 |
| -1195.8  | -1091.15 | -88.8996 | -99.963  | 4.929884 | 0 | -1.58719 | 0 |
| -1198.69 | -1094.62 | -20.7893 | -41.4269 | 8.410461 | 0 | -0.79761 | 0 |
| -5769.56 | -4001.33 | -70.7623 | -83.8226 | 3.550148 | 0 | -1.57051 | 0 |
| -5778.4  | -4005.07 | -6.78081 | -26.4559 | 8.882673 | 0 | -0.87859 | 0 |

|          |          |          |          |          |   |          |   |
|----------|----------|----------|----------|----------|---|----------|---|
| -5812.11 | -4011.11 | -40.0247 | -23.4584 | 3.636875 | 0 | -0.44437 | 0 |
| -5772.04 | -4002.13 | -97.7591 | -115.177 | 2.116178 | 0 | -1.57533 | 0 |
| -5777.33 | -4004.04 | -20.8463 | -41.4265 | 8.409915 | 0 | -0.79761 | 0 |
| -4211.1  | -6000.78 | -66.4574 | -79.0542 | 6.680449 | 0 | -1.58004 | 0 |
| -4233.19 | -5994.38 | -2.88852 | -25.6282 | 11.73404 | 0 | -0.80451 | 0 |
| -4272.52 | -6004.86 | -39.9421 | -23.3585 | 3.637273 | 0 | -0.44432 | 0 |
| -4177.18 | -5996.09 | -98.8983 | -78.5727 | 5.080002 | 0 | -0.82022 | 0 |
| -4235.06 | -5998.34 | -20.7913 | -41.4269 | 8.410051 | 0 | -0.79762 | 0 |
| -2207.87 | -1382.86 | -74.8498 | -91.0131 | 3.5786   | 0 | -1.57019 | 0 |
| -2204.45 | -1389.84 | -6.84418 | -26.4549 | 8.882944 | 0 | -0.87859 | 0 |
| -2281.17 | -1390.96 | -40.1608 | -23.3576 | 3.638047 | 0 | -0.44432 | 0 |
| -2227.38 | -1384.15 | -105.574 | -91.3286 | 4.313658 | 0 | -0.8196  | 0 |
| -2202.99 | -1386.48 | -20.7988 | -41.4266 | 8.410396 | 0 | -0.79761 | 0 |
| -3446.32 | -2671.26 | -65.2488 | -74.5121 | 5.434823 | 0 | -1.57987 | 0 |
| -3444.86 | -2675.34 | -3.62155 | -21.2899 | 8.781651 | 0 | -0.87917 | 0 |
| -3421.46 | -2674.47 | -40.1897 | -23.4582 | 3.639655 | 0 | -0.44439 | 0 |
| -3332.79 | -2671.7  | -98.6199 | -78.5751 | 5.077234 | 0 | -0.82024 | 0 |
| -3453.37 | -2668.47 | -21.0272 | -41.3903 | 8.375581 | 0 | -0.79793 | 0 |
| -5802.49 | -5660.49 | -67.8468 | -78.7019 | 5.592672 | 0 | -1.58164 | 0 |
| -5819.44 | -5663.26 | -3.58568 | -21.2898 | 8.780498 | 0 | -0.87919 | 0 |
| -5826.91 | -5675    | -40.0709 | -23.3579 | 3.636484 | 0 | -0.44431 | 0 |
| -5798.04 | -5660.69 | -87.9816 | -98.4472 | 4.932465 | 0 | -1.5873  | 0 |
| -5807.79 | -5663.31 | -20.7709 | -41.4269 | 8.411352 | 0 | -0.79761 | 0 |
| -896.054 | -425.868 | -71.5997 | -87.1419 | 4.660799 | 0 | -1.57058 | 0 |
| -991.981 | -433.991 | -36.5224 | -23.9587 | 8.627959 | 0 | -0.17766 | 0 |
| -994.877 | -442.932 | -40.1948 | -23.4577 | 3.63878  | 0 | -0.44437 | 0 |
| -988.625 | -428.165 | -98.6127 | -78.5807 | 5.084493 | 0 | -0.82024 | 0 |
| -899.362 | -435.244 | -20.8088 | -41.4267 | 8.410299 | 0 | -0.79761 | 0 |

r\_psp\_Ligar\_psp\_Ligar\_psp\_Ligar\_psp\_Ligar\_psp\_Recr\_psp\_Recr\_psp\_Recr\_psp\_Recr\_psp\_Recr

|   |          |          |          |          |          |          |          |
|---|----------|----------|----------|----------|----------|----------|----------|
| 0 | -16.4495 | 29.02112 | -45719.6 | -34440.3 | 4863.056 | -724.358 | -3092.59 |
| 0 | -8.70711 | 18.63116 | -45719.6 | -34440.3 | 4863.056 | -724.358 | -3092.59 |
| 0 | -29.9182 | 9.954917 | -45719.6 | -34440.3 | 4863.056 | -724.358 | -3092.59 |
| 0 | -14.7804 | 27.65505 | -45719.6 | -34440.3 | 4863.056 | -724.358 | -3092.59 |
| 0 | -5.86479 | 18.61977 | -45719.6 | -34440.3 | 4863.056 | -724.358 | -3092.59 |

|   |          |          |          |          |          |          |          |
|---|----------|----------|----------|----------|----------|----------|----------|
| 0 | -16.0871 | 28.88586 | -32902.5 | -24698.9 | 3423.771 | -465.004 | -2186.09 |
| 0 | -7.04816 | 18.75567 | -32902.5 | -24698.9 | 3423.771 | -465.004 | -2186.09 |
| 0 | -29.8588 | 9.954588 | -32902.5 | -24698.9 | 3423.771 | -465.004 | -2186.09 |
| 0 | -11.4671 | 28.32726 | -32902.5 | -24698.9 | 3423.771 | -465.004 | -2186.09 |
| 0 | -5.8926  | 18.61815 | -32902.5 | -24698.9 | 3423.771 | -465.004 | -2186.09 |

|   |          |          |          |          |         |          |          |
|---|----------|----------|----------|----------|---------|----------|----------|
| 0 | -14.8351 | 28.66934 | -41345.3 | -33489.2 | 5528.59 | -610.871 | -3327.43 |
| 0 | -7.67943 | 17.21071 | -41345.3 | -33489.2 | 5528.59 | -610.871 | -3327.43 |
| 0 | -29.8198 | 9.954478 | -41345.3 | -33489.2 | 5528.59 | -610.871 | -3327.43 |
| 0 | -11.5084 | 28.31006 | -41345.3 | -33489.2 | 5528.59 | -610.871 | -3327.43 |
| 0 | -5.89114 | 18.61858 | -41345.3 | -33489.2 | 5528.59 | -610.871 | -3327.43 |

|   |          |          |        |          |          |          |          |
|---|----------|----------|--------|----------|----------|----------|----------|
| 0 | -19.2779 | 27.7138  | -12616 | -9375.81 | 1105.056 | -172.105 | -682.531 |
| 0 | -8.81742 | 18.63126 | -12616 | -9375.81 | 1105.056 | -172.105 | -682.531 |
| 0 | -29.8554 | 9.953174 | -12616 | -9375.81 | 1105.056 | -172.105 | -682.531 |
| 0 | -12.3104 | 27.65542 | -12616 | -9375.81 | 1105.056 | -172.105 | -682.531 |
| 0 | -5.94733 | 18.61801 | -12616 | -9375.81 | 1105.056 | -172.105 | -682.531 |

|   |          |          |          |          |         |          |          |
|---|----------|----------|----------|----------|---------|----------|----------|
| 0 | -20.8975 | 27.50024 | -40335.7 | -29998.5 | 4490.26 | -596.692 | -2529.73 |
| 0 | -8.81898 | 18.63018 | -40335.7 | -29998.5 | 4490.26 | -596.692 | -2529.73 |
| 0 | -30.0241 | 9.954067 | -40335.7 | -29998.5 | 4490.26 | -596.692 | -2529.73 |
| 0 | -14.0799 | 27.16317 | -40335.7 | -29998.5 | 4490.26 | -596.692 | -2529.73 |
| 0 | -5.91072 | 18.61865 | -40335.7 | -29998.5 | 4490.26 | -596.692 | -2529.73 |

|   |          |          |          |          |          |          |          |
|---|----------|----------|----------|----------|----------|----------|----------|
| 0 | -15.7637 | 28.36313 | -10512.9 | -8599.78 | 1221.575 | -158.912 | -644.732 |
| 0 | -7.10846 | 18.75446 | -10512.9 | -8599.78 | 1221.575 | -158.912 | -644.732 |
| 0 | -29.8186 | 9.953642 | -10512.9 | -8599.78 | 1221.575 | -158.912 | -644.732 |
| 0 | -18.538  | 26.25863 | -10512.9 | -8599.78 | 1221.575 | -158.912 | -644.732 |
| 0 | -5.54202 | 18.56674 | -10512.9 | -8599.78 | 1221.575 | -158.912 | -644.732 |

|   |          |          |          |          |          |          |          |
|---|----------|----------|----------|----------|----------|----------|----------|
| 0 | -17.2185 | 28.29915 | -36029.6 | -27171.4 | 3758.044 | -531.798 | -2163.16 |
| 0 | -7.08418 | 18.75513 | -36029.6 | -27171.4 | 3758.044 | -531.798 | -2163.16 |

|   |          |          |          |          |          |          |          |
|---|----------|----------|----------|----------|----------|----------|----------|
| 0 | -29.7136 | 9.954773 | -36029.6 | -27171.4 | 3758.044 | -531.798 | -2163.16 |
| 0 | -11.4425 | 28.31951 | -36029.6 | -27171.4 | 3758.044 | -531.798 | -2163.16 |
| 0 | -5.59927 | 18.56717 | -36029.6 | -27171.4 | 3758.044 | -531.798 | -2163.16 |
|   |          |          |          |          |          |          |          |
| 0 | -19.9402 | 27.4366  | -42301.6 | -32431.1 | 4351.696 | -648.232 | -3103.21 |
| 0 | -7.08414 | 18.89428 | -42301.6 | -32431.1 | 4351.696 | -648.232 | -3103.21 |
| 0 | -29.731  | 9.954495 | -42301.6 | -32431.1 | 4351.696 | -648.232 | -3103.21 |
| 0 | -50.9821 | 26.39669 | -42301.6 | -32431.1 | 4351.696 | -648.232 | -3103.21 |
| 0 | -5.544   | 18.56714 | -42301.6 | -32431.1 | 4351.696 | -648.232 | -3103.21 |
|   |          |          |          |          |          |          |          |
| 0 | -14.4814 | 28.63629 | -11535.9 | -8049.69 | 975.2657 | -178.296 | -654.401 |
| 0 | -7.14804 | 18.75439 | -11535.9 | -8049.69 | 975.2657 | -178.296 | -654.401 |
| 0 | -29.9512 | 9.954288 | -11535.9 | -8049.69 | 975.2657 | -178.296 | -654.401 |
| 0 | -45.8348 | 28.09578 | -11535.9 | -8049.69 | 975.2657 | -178.296 | -654.401 |
| 0 | -5.55161 | 18.56669 | -11535.9 | -8049.69 | 975.2657 | -178.296 | -654.401 |
|   |          |          |          |          |          |          |          |
| 0 | -22.0583 | 27.46654 | -21431.7 | -15774.6 | 2259.42  | -336.075 | -1356.75 |
| 0 | -8.86454 | 18.63037 | -21431.7 | -15774.6 | 2259.42  | -336.075 | -1356.75 |
| 0 | -29.8798 | 9.953127 | -21431.7 | -15774.6 | 2259.42  | -336.075 | -1356.75 |
| 0 | -50.703  | 26.40118 | -21431.7 | -15774.6 | 2259.42  | -336.075 | -1356.75 |
| 0 | -5.83273 | 18.61816 | -21431.7 | -15774.6 | 2259.42  | -336.075 | -1356.75 |
|   |          |          |          |          |          |          |          |
| 0 | -20.7777 | 27.62177 | -40756.7 | -30332.6 | 4270.25  | -651.503 | -2415.48 |
| 0 | -8.82842 | 18.63125 | -40756.7 | -30332.6 | 4270.25  | -651.503 | -2415.48 |
| 0 | -29.8602 | 9.955103 | -40756.7 | -30332.6 | 4270.25  | -651.503 | -2415.48 |
| 0 | -19.1236 | 26.24405 | -40756.7 | -30332.6 | 4270.25  | -651.503 | -2415.48 |
| 0 | -5.5236  | 18.56583 | -40756.7 | -30332.6 | 4270.25  | -651.503 | -2415.48 |
|   |          |          |          |          |          |          |          |
| 0 | -15.8847 | 28.33662 | -3984.33 | -2926.32 | 584.9682 | -44.4664 | -221.021 |
| 0 | -40.4862 | 19.47219 | -3984.33 | -2926.32 | 584.9682 | -44.4664 | -221.021 |
| 0 | -29.8859 | 9.954281 | -3984.33 | -2926.32 | 584.9682 | -44.4664 | -221.021 |
| 0 | -50.6914 | 26.39506 | -3984.33 | -2926.32 | 584.9682 | -44.4664 | -221.021 |
| 0 | -5.56159 | 18.56685 | -3984.33 | -2926.32 | 584.9682 | -44.4664 | -221.021 |

r\_psp\_Recr\_psp\_Recr\_psp\_Recr\_psp\_Recr\_psp\_MM r\_psp\_MM r\_psp\_MM r\_psp\_MM

|          |          |          |          |          |          |           |          |
|----------|----------|----------|----------|----------|----------|-----------|----------|
| -188.768 | -132.016 | -5598.16 | -6406.49 | -41.1945 | -23.7372 | 6.20E-09  | -2.51947 |
| -188.768 | -132.016 | -5598.16 | -6406.49 | -31.7519 | -13.0364 | -4.00E-10 | -1.2746  |
| -188.768 | -132.016 | -5598.16 | -6406.49 | -29.5992 | -92.5092 | 3.30E-10  | -4.1141  |
| -188.768 | -132.016 | -5598.16 | -6406.49 | -48.7136 | -27.4354 | 7.25E-09  | -2.50654 |
| -188.768 | -132.016 | -5598.16 | -6406.49 | -33.3762 | -3.82101 | -2.42E-09 | -0.00334 |

|          |          |          |          |          |          |          |          |
|----------|----------|----------|----------|----------|----------|----------|----------|
| -136.579 | -76.6085 | -4261.38 | -4501.74 | -43.4044 | -32.7892 | -0.00192 | -2.81397 |
| -136.579 | -76.6085 | -4261.38 | -4501.74 | -32.6438 | -17.4348 | -0.00192 | -0.9016  |
| -136.579 | -76.6085 | -4261.38 | -4501.74 | 7.675901 | 22.37927 | -0.00192 | -2.40728 |
| -136.579 | -76.6085 | -4261.38 | -4501.74 | -23.5592 | -13.7807 | -0.00192 | -2.2576  |
| -136.579 | -76.6085 | -4261.38 | -4501.74 | -17.8314 | -12.9919 | -0.00192 | -0.54326 |

|          |          |          |          |          |          |           |          |
|----------|----------|----------|----------|----------|----------|-----------|----------|
| -200.276 | -78.1593 | -3987.28 | -5180.63 | -38.0312 | -20.2887 | 8.79E-10  | -2.3742  |
| -200.276 | -78.1593 | -3987.28 | -5180.63 | -30.9528 | -11.7976 | 2.70E-09  | -1.00698 |
| -200.276 | -78.1593 | -3987.28 | -5180.63 | -24.2865 | -14.4217 | 2.59E-09  | -1.15623 |
| -200.276 | -78.1593 | -3987.28 | -5180.63 | -37.1705 | -20.867  | -4.33E-09 | -1.47805 |
| -200.276 | -78.1593 | -3987.28 | -5180.63 | -27.486  | -5.69918 | -3.81E-09 | -0.63424 |

|          |          |         |          |          |          |           |          |
|----------|----------|---------|----------|----------|----------|-----------|----------|
| -20.4308 | -15.0219 | -2121.1 | -1334.05 | 21.68087 | -58.3486 | -3.20E-09 | -2.99235 |
| -20.4308 | -15.0219 | -2121.1 | -1334.05 | -24.2735 | -18.9301 | 2.00E-10  | -1.04307 |
| -20.4308 | -15.0219 | -2121.1 | -1334.05 | 21.83197 | -93.708  | -2.97E-09 | -0.5289  |
| -20.4308 | -15.0219 | -2121.1 | -1334.05 | 31.71634 | -59.9019 | -5.38E-09 | -1.28588 |
| -20.4308 | -15.0219 | -2121.1 | -1334.05 | 47.19396 | -32.1644 | -3.60E-09 | -0.05247 |

|          |          |          |          |          |          |           |          |
|----------|----------|----------|----------|----------|----------|-----------|----------|
| -78.1069 | -30.8559 | -6640.27 | -4951.73 | -54.6227 | -19.7907 | -3.50E-10 | -0.82442 |
| -78.1069 | -30.8559 | -6640.27 | -4951.73 | -45.9548 | -10.5527 | -5.50E-09 | -0.70903 |
| -78.1069 | -30.8559 | -6640.27 | -4951.73 | -14.4128 | 48.40862 | 8.91E-11  | -0.62105 |
| -78.1069 | -30.8559 | -6640.27 | -4951.73 | -55.9591 | -21.688  | -2.39E-09 | -0.85534 |
| -78.1069 | -30.8559 | -6640.27 | -4951.73 | -40.1382 | -7.99413 | -3.10E-09 | -0.34857 |

|          |          |          |       |          |          |           |          |
|----------|----------|----------|-------|----------|----------|-----------|----------|
| -29.6458 | -5.21211 | -1206.22 | -1090 | -41.9164 | -19.8016 | -9.70E-10 | -2.04615 |
| -29.6458 | -5.21211 | -1206.22 | -1090 | -37.6667 | -8.99593 | -4.10E-09 | -0.56932 |
| -29.6458 | -5.21211 | -1206.22 | -1090 | -20.5203 | -20.8959 | -1.71E-09 | -1.56746 |
| -29.6458 | -5.21211 | -1206.22 | -1090 | -37.1167 | -22.6912 | -2.69E-09 | -1.80474 |
| -29.6458 | -5.21211 | -1206.22 | -1090 | -37.3393 | -3.38504 | 3.24E-09  | -0.40195 |

|          |          |          |          |          |          |           |          |
|----------|----------|----------|----------|----------|----------|-----------|----------|
| -72.6589 | -71.0338 | -5781.69 | -3995.94 | -35.0979 | -14.136  | -3.28E-09 | -1.18965 |
| -72.6589 | -71.0338 | -5781.69 | -3995.94 | -40.0881 | -7.40368 | -5.80E-09 | -1.80341 |

|          |          |          |          |          |          |           |          |
|----------|----------|----------|----------|----------|----------|-----------|----------|
| -72.6589 | -71.0338 | -5781.69 | -3995.94 | -20.6477 | 20.72797 | -3.10E-09 | -0.9091  |
| -72.6589 | -71.0338 | -5781.69 | -3995.94 | -35.7178 | -1.92423 | -2.13E-09 | -1.12486 |
| -72.6589 | -71.0338 | -5781.69 | -3995.94 | -38.2468 | -2.77815 | -2.93E-09 | -0.01697 |
| -127.841 | -105.836 | -4245.08 | -5992.06 | -49.0335 | -36.9743 | 2.50E-09  | -2.96885 |
| -127.841 | -105.836 | -4245.08 | -5992.06 | -41.5124 | -17.5616 | 4.00E-09  | -1.35739 |
| -127.841 | -105.836 | -4245.08 | -5992.06 | -7.0069  | 30.84715 | -8.40E-10 | -1.08961 |
| -127.841 | -105.836 | -4245.08 | -5992.06 | 8.131912 | -53.4899 | 1.49E-09  | -0.97734 |
| -127.841 | -105.836 | -4245.08 | -5992.06 | -43.687  | -10.8834 | -1.00E-10 | -0.57415 |
| -15.8666 | -20.6568 | -2216.92 | -1375.37 | -43.0006 | -18.7416 | 7.80E-10  | -1.5804  |
| -15.8666 | -20.6568 | -2216.92 | -1375.37 | -53.0091 | -20.5747 | 5.00E-10  | -2.55748 |
| -15.8666 | -20.6568 | -2216.92 | -1375.37 | -26.4188 | 52.29735 | 2.10E-10  | -2.70303 |
| -15.8666 | -20.6568 | -2216.92 | -1375.37 | -19.6619 | -6.18366 | 8.00E-10  | -2.74501 |
| -15.8666 | -20.6568 | -2216.92 | -1375.37 | -43.9522 | -14.8859 | 2.50E-10  | -2.571   |
| -63.2925 | -31.9887 | -3462.71 | -2665.65 | -58.7253 | -37.7657 | -2.70E-09 | -2.599   |
| -63.2925 | -31.9887 | -3462.71 | -2665.65 | -29.9406 | -10.7731 | -6.60E-09 | -0.56372 |
| -63.2925 | -31.9887 | -3462.71 | -2665.65 | -18.4445 | -61.2453 | -2.82E-09 | -2.05508 |
| -63.2925 | -31.9887 | -3462.71 | -2665.65 | -18.5239 | -144.234 | -6.62E-09 | -1.87068 |
| -63.2925 | -31.9887 | -3462.71 | -2665.65 | -35.0285 | -11.8092 | -1.46E-09 | -0.81115 |
| -91.5743 | -51.506  | -5830.47 | -5653.79 | -40.6254 | -25.0482 | -2.00E-10 | -1.81288 |
| -91.5743 | -51.506  | -5830.47 | -5653.79 | -47.6521 | -19.7996 | -1.59E-09 | -2.04875 |
| -91.5743 | -51.506  | -5830.47 | -5653.79 | -30.3738 | -17.0518 | 2.56E-09  | -2.4847  |
| -91.5743 | -51.506  | -5830.47 | -5653.79 | -32.5788 | -21.6972 | -5.82E-09 | -1.05466 |
| -91.5743 | -51.506  | -5830.47 | -5653.79 | -39.1589 | -17.3813 | 4.80E-10  | -0.93545 |
| -10.8518 | -24.4398 | -905.335 | -436.87  | -40.5624 | -33.9716 | 4.20E-10  | -2.97174 |
| -10.8518 | -24.4398 | -905.335 | -436.87  | -3.63567 | 63.92897 | 6.50E-10  | -1.21878 |
| -10.8518 | -24.4398 | -905.335 | -436.87  | -15.2913 | 70.78214 | 5.00E-10  | -0.82127 |
| -10.8518 | -24.4398 | -905.335 | -436.87  | -10.2052 | 50.65095 | -8.00E-11 | -1.15546 |
| -10.8518 | -24.4398 | -905.335 | -436.87  | -21.0886 | -7.09408 | 3.50E-10  | -1.18657 |



r\_psp\_MM r\_psp\_MM r\_psp\_MM r\_psp\_MM r\_psp\_MM r\_psp\_MM r\_psp\_Rec r\_psp\_Rec r\_psp\_Rec

|          |          |   |          |          |   |   |   |
|----------|----------|---|----------|----------|---|---|---|
| -12.6169 | -7.02736 | 0 | 44.07689 | -39.3705 | 0 | 0 | 0 |
| -9.94318 | -3.59866 | 0 | 19.12794 | -23.027  | 0 | 0 | 0 |
| -7.40352 | -1.93389 | 0 | 99.2123  | -22.8508 | 0 | 0 | 0 |
| -12.612  | -6.99743 | 0 | 38.28988 | -37.4521 | 0 | 0 | 0 |
| -14.1169 | -3.17024 | 0 | 20.65428 | -32.919  | 0 | 0 | 0 |

|          |          |   |          |          |   |   |   |
|----------|----------|---|----------|----------|---|---|---|
| -23.6104 | -10.4461 | 0 | 64.54835 | -38.2911 | 0 | 0 | 0 |
| -24.1261 | -13.3664 | 0 | 48.95409 | -25.7671 | 0 | 0 | 0 |
| -15.5293 | -3.65979 | 0 | 31.35928 | -24.4643 | 0 | 0 | 0 |
| -23.5186 | -10.3682 | 0 | 65.72573 | -39.3579 | 0 | 0 | 0 |
| -21.2943 | -10.1892 | 0 | 59.16132 | -31.9722 | 0 | 0 | 0 |

|          |          |   |          |          |   |   |   |
|----------|----------|---|----------|----------|---|---|---|
| -9.64603 | -2.28028 | 0 | 19.04242 | -22.4845 | 0 | 0 | 0 |
| -11.0212 | -1.70067 | 0 | 11.18509 | -16.6115 | 0 | 0 | 0 |
| -10.5816 | -0.45011 | 0 | 19.26184 | -16.9388 | 0 | 0 | 0 |
| -12.6392 | -1.61408 | 0 | 19.91483 | -20.4871 | 0 | 0 | 0 |
| -11.323  | -2.72482 | 0 | 7.611136 | -14.7159 | 0 | 0 | 0 |

|          |          |   |          |          |   |   |   |
|----------|----------|---|----------|----------|---|---|---|
| -8.28194 | -0.75099 | 0 | 122.1295 | -30.0748 | 0 | 0 | 0 |
| -9.49135 | -0.05021 | 0 | 25.0111  | -19.7699 | 0 | 0 | 0 |
| -4.76245 | -0.0025  | 0 | 133.787  | -12.9531 | 0 | 0 | 0 |
| -6.53611 | -0.17221 | 0 | 131.4263 | -31.8139 | 0 | 0 | 0 |
| -9.01397 | -1.08285 | 0 | 112.91   | -23.4024 | 0 | 0 | 0 |

|          |          |   |          |          |   |   |   |
|----------|----------|---|----------|----------|---|---|---|
| -17.8506 | -8.46615 | 0 | 26.96457 | -34.6555 | 0 | 0 | 0 |
| -15.0636 | -3.08682 | 0 | 11.69208 | -28.2348 | 0 | 0 | 0 |
| -13.4963 | -0.82168 | 0 | -23.6474 | -24.235  | 0 | 0 | 0 |
| -18.1952 | -8.45282 | 0 | 26.76416 | -33.532  | 0 | 0 | 0 |
| -14.4439 | -6.83483 | 0 | 13.32845 | -23.8452 | 0 | 0 | 0 |

|          |          |   |          |          |   |   |   |
|----------|----------|---|----------|----------|---|---|---|
| -10.5989 | -2.34245 | 0 | 28.34553 | -35.4728 | 0 | 0 | 0 |
| -14.0317 | -5.0438  | 0 | 16.50435 | -25.5303 | 0 | 0 | 0 |
| -9.47385 | -0.71943 | 0 | 31.83214 | -19.6958 | 0 | 0 | 0 |
| -11.4298 | -1.51082 | 0 | 29.02197 | -28.7021 | 0 | 0 | 0 |
| -15.7932 | -7.38885 | 0 | 13.03952 | -23.4097 | 0 | 0 | 0 |

|          |          |   |          |          |   |   |   |
|----------|----------|---|----------|----------|---|---|---|
| -12.4911 | -1.69268 | 0 | 29.1122  | -34.7006 | 0 | 0 | 0 |
| -13.1816 | -1.45092 | 0 | 10.03507 | -26.2836 | 0 | 0 | 0 |

|          |           |   |          |          |   |   |   |
|----------|-----------|---|----------|----------|---|---|---|
| -11.3935 | -3.36164  | 0 | -0.63119 | -25.0802 | 0 | 0 | 0 |
| -13.0593 | -4.76816  | 0 | 20.95382 | -35.7952 | 0 | 0 | 0 |
| -17.2564 | -1.33342  | 0 | 9.926185 | -26.7881 | 0 | 0 | 0 |
| -16.651  | -9.41733  | 0 | 54.70749 | -37.7295 | 0 | 0 | 0 |
| -17.8966 | -3.89003  | 0 | 19.31842 | -20.1252 | 0 | 0 | 0 |
| -14.7892 | -2.11719  | 0 | 2.424421 | -22.2825 | 0 | 0 | 0 |
| -16.0821 | -7.28101  | 0 | 118.1843 | -32.2221 | 0 | 0 | 0 |
| -18.0159 | -6.26889  | 0 | 15.70822 | -23.6528 | 0 | 0 | 0 |
| -11.1665 | -0.00042  | 0 | 23.3727  | -34.8843 | 0 | 0 | 0 |
| -17.0817 | -0.11744  | 0 | 19.19404 | -31.8718 | 0 | 0 | 0 |
| -15.1871 | -6.85E-08 | 0 | -34.2877 | -26.5384 | 0 | 0 | 0 |
| -11.7191 | -0.06091  | 0 | 38.88426 | -37.8376 | 0 | 0 | 0 |
| -16.1552 | -0.11111  | 0 | 19.48895 | -29.7179 | 0 | 0 | 0 |
| -17.4204 | -4.64806  | 0 | 38.68111 | -34.9732 | 0 | 0 | 0 |
| -14.0883 | -3.06263  | 0 | 26.58759 | -28.0405 | 0 | 0 | 0 |
| -8.14635 | -0.24721  | 0 | 71.30184 | -18.0523 | 0 | 0 | 0 |
| -14.2062 | -4.56776  | 0 | 180.3587 | -34.0044 | 0 | 0 | 0 |
| -12.9688 | -2.36691  | 0 | 15.2047  | -22.2772 | 0 | 0 | 0 |
| -19.0822 | -7.1224   | 0 | 48.68806 | -36.2478 | 0 | 0 | 0 |
| -15.0391 | -2.24718  | 0 | 19.80825 | -28.3257 | 0 | 0 | 0 |
| -12.0573 | -0.78364  | 0 | 33.5371  | -31.5335 | 0 | 0 | 0 |
| -19.0285 | -7.47096  | 0 | 51.80865 | -35.1361 | 0 | 0 | 0 |
| -15.4871 | -5.8915   | 0 | 28.59412 | -28.0577 | 0 | 0 | 0 |
| -8.12473 | -1.57066  | 0 | 25.97809 | -19.9018 | 0 | 0 | 0 |
| -2.9079  | -0.66417  | 0 | -46.2321 | -16.5417 | 0 | 0 | 0 |
| -8.64985 | -1.42434  | 0 | -59.6739 | -15.504  | 0 | 0 | 0 |
| -6.28134 | -1.61373  | 0 | -32.7319 | -19.0737 | 0 | 0 | 0 |
| -6.43445 | -0.69238  | 0 | 11.53043 | -17.2116 | 0 | 0 | 0 |

r\_psp\_Rec.r\_psp\_Rec.r\_psp\_Rec.r\_psp\_Rec.r\_psp\_Rec.r\_psp\_Rec.r\_psp\_Rec\_Strain\_vdW

|   |   |   |   |   |   |
|---|---|---|---|---|---|
| 0 | 0 | 0 | 0 | 0 | 0 |
| 0 | 0 | 0 | 0 | 0 | 0 |
| 0 | 0 | 0 | 0 | 0 | 0 |
| 0 | 0 | 0 | 0 | 0 | 0 |
| 0 | 0 | 0 | 0 | 0 | 0 |

|   |   |   |   |   |   |
|---|---|---|---|---|---|
| 0 | 0 | 0 | 0 | 0 | 0 |
| 0 | 0 | 0 | 0 | 0 | 0 |
| 0 | 0 | 0 | 0 | 0 | 0 |
| 0 | 0 | 0 | 0 | 0 | 0 |
| 0 | 0 | 0 | 0 | 0 | 0 |

|   |   |   |   |   |   |
|---|---|---|---|---|---|
| 0 | 0 | 0 | 0 | 0 | 0 |
| 0 | 0 | 0 | 0 | 0 | 0 |
| 0 | 0 | 0 | 0 | 0 | 0 |
| 0 | 0 | 0 | 0 | 0 | 0 |
| 0 | 0 | 0 | 0 | 0 | 0 |

|   |   |   |   |   |   |
|---|---|---|---|---|---|
| 0 | 0 | 0 | 0 | 0 | 0 |
| 0 | 0 | 0 | 0 | 0 | 0 |
| 0 | 0 | 0 | 0 | 0 | 0 |
| 0 | 0 | 0 | 0 | 0 | 0 |
| 0 | 0 | 0 | 0 | 0 | 0 |

|   |   |   |   |   |   |
|---|---|---|---|---|---|
| 0 | 0 | 0 | 0 | 0 | 0 |
| 0 | 0 | 0 | 0 | 0 | 0 |
| 0 | 0 | 0 | 0 | 0 | 0 |
| 0 | 0 | 0 | 0 | 0 | 0 |
| 0 | 0 | 0 | 0 | 0 | 0 |

|   |   |   |   |   |   |
|---|---|---|---|---|---|
| 0 | 0 | 0 | 0 | 0 | 0 |
| 0 | 0 | 0 | 0 | 0 | 0 |
| 0 | 0 | 0 | 0 | 0 | 0 |
| 0 | 0 | 0 | 0 | 0 | 0 |
| 0 | 0 | 0 | 0 | 0 | 0 |

|   |   |   |   |   |   |
|---|---|---|---|---|---|
| 0 | 0 | 0 | 0 | 0 | 0 |
| 0 | 0 | 0 | 0 | 0 | 0 |

|   |   |   |   |   |   |
|---|---|---|---|---|---|
| 0 | 0 | 0 | 0 | 0 | 0 |
| 0 | 0 | 0 | 0 | 0 | 0 |
| 0 | 0 | 0 | 0 | 0 | 0 |

|   |   |   |   |   |   |
|---|---|---|---|---|---|
| 0 | 0 | 0 | 0 | 0 | 0 |
| 0 | 0 | 0 | 0 | 0 | 0 |
| 0 | 0 | 0 | 0 | 0 | 0 |
| 0 | 0 | 0 | 0 | 0 | 0 |
| 0 | 0 | 0 | 0 | 0 | 0 |

|   |   |   |   |   |   |
|---|---|---|---|---|---|
| 0 | 0 | 0 | 0 | 0 | 0 |
| 0 | 0 | 0 | 0 | 0 | 0 |
| 0 | 0 | 0 | 0 | 0 | 0 |
| 0 | 0 | 0 | 0 | 0 | 0 |
| 0 | 0 | 0 | 0 | 0 | 0 |

|   |   |   |   |   |   |
|---|---|---|---|---|---|
| 0 | 0 | 0 | 0 | 0 | 0 |
| 0 | 0 | 0 | 0 | 0 | 0 |
| 0 | 0 | 0 | 0 | 0 | 0 |
| 0 | 0 | 0 | 0 | 0 | 0 |
| 0 | 0 | 0 | 0 | 0 | 0 |

|   |   |   |   |   |   |
|---|---|---|---|---|---|
| 0 | 0 | 0 | 0 | 0 | 0 |
| 0 | 0 | 0 | 0 | 0 | 0 |
| 0 | 0 | 0 | 0 | 0 | 0 |
| 0 | 0 | 0 | 0 | 0 | 0 |
| 0 | 0 | 0 | 0 | 0 | 0 |

|   |   |   |   |   |   |
|---|---|---|---|---|---|
| 0 | 0 | 0 | 0 | 0 | 0 |
| 0 | 0 | 0 | 0 | 0 | 0 |
| 0 | 0 | 0 | 0 | 0 | 0 |
| 0 | 0 | 0 | 0 | 0 | 0 |
| 0 | 0 | 0 | 0 | 0 | 0 |
